# Supplementary material for: Inverse dynamic modelling of jumping in the red-legged running frogKassina maculata
Source: Oxford University Press journal article supplement (doi:10.1242/jeb.155416), 2017-01-01
Supplement: jeb155416supp.pdf [file jeb155416supp.pdf]

**Table S1.** Experimental summary, including information on subjects and trials, and body segment properties from CT scans for KM07.

| <b>Subject #</b> | <b>Mass (g)</b> | <b>SVL (mm)</b> | <b># Trials</b> |  |
|------------------|-----------------|-----------------|-----------------|--|
| KM03             | 25.5            | 58              | 12              |  |
| KM04             | 25.5            | 60              | 15              |  |
| KM05             | 34.6            | 61              | 8               |  |
| KM06             | 28.1            | 61              | 15              |  |

  

| <b>Segment</b> | <b>Mass (g)</b> | <b>I<sub>x</sub> (g cm<sup>2</sup>)</b> | <b>I<sub>y</sub> (g cm<sup>2</sup>)</b> | <b>I<sub>z</sub> (g cm<sup>2</sup>)</b> |
|----------------|-----------------|-----------------------------------------|-----------------------------------------|-----------------------------------------|
| Body           | 7.2             | 33.52                                   | 4.73                                    | 33.78                                   |
| Pelvis         | 1.3             | 0.72                                    | 0.34                                    | 0.7                                     |
| Thigh          | 0.78            | 0.79                                    | 0.08                                    | 0.79                                    |
| Shank          | 0.36            | 0.37                                    | 0.02                                    | 0.37                                    |
| Tarsus         | 0.16            | 0.06                                    | 0.005                                   | 0.06                                    |
| Foot           | 0.16            | 0.09                                    | 0.005                                   | 0.09                                    |

**Table S2.** Experimental data and results from inverse dynamics analyses during jumping in *Kassina maculata*, including: forces (single foot) exerted on the ground, kinematic performance metrics, joint and body angles (minimum, maximum and range), 3D external joint moment arm lengths, and external joint moments (torques - 3D, XY and XZ) for four individuals and 50 trials.

| Trial       | Peak Vertical Force (N) | Peak Fore-Aft Force (N) | Vertical/Fore-aft Force Ratio | Peak Total Force (N) | % Body Weight of Total Force | Vertical/Horizontal Time Ratio |
|-------------|-------------------------|-------------------------|-------------------------------|----------------------|------------------------------|--------------------------------|
| KM03_HOP_01 | -0.16                   | -0.11                   | 1.50                          | 0.26                 | 1.03                         | 1.00                           |
| KM03_HOP_02 | -0.17                   | -0.11                   | 1.61                          | 0.26                 | 1.05                         | 0.93                           |
| KM03_HOP_03 | -0.17                   | -0.14                   | 1.22                          | 0.27                 | 1.09                         | 0.90                           |
| KM03_HOP_04 | -0.25                   | -0.17                   | 1.49                          | 0.39                 | 1.55                         | 0.99                           |
| KM03_HOP_05 | -0.39                   | -0.12                   | 3.20                          | 0.56                 | 2.25                         | 1.00                           |
| KM03_HOP_06 | -0.33                   | -0.12                   | 2.76                          | 0.48                 | 1.92                         | 1.02                           |
| KM03_HOP_07 | -0.31                   | -0.14                   | 2.26                          | 0.45                 | 1.81                         | 1.02                           |
| KM03_HOP_08 | -0.33                   | -0.12                   | 2.70                          | 0.49                 | 1.95                         | 1.02                           |
| KM03_HOP_09 | -0.35                   | -0.15                   | 2.43                          | 0.52                 | 2.08                         | 1.01                           |
| KM03_HOP_10 | -0.14                   | -0.10                   | 1.34                          | 0.21                 | 0.84                         | 0.94                           |
| KM03_HOP_11 | -0.24                   | -0.17                   | 1.38                          | 0.38                 | 1.50                         | 0.98                           |
| KM03_HOP_12 | -0.19                   | -0.14                   | 1.40                          | 0.29                 | 1.17                         | 0.91                           |
| KM04_HOP_01 | -0.30                   | -0.17                   | 1.79                          | 0.46                 | 1.79                         | 0.98                           |
| KM04_HOP_02 | -0.17                   | -0.20                   | 0.82                          | 0.29                 | 1.11                         | 0.76                           |
| KM04_HOP_03 | -0.16                   | -0.14                   | 1.16                          | 0.27                 | 1.05                         | 1.00                           |
| KM04_HOP_04 | -0.14                   | -0.11                   | 1.22                          | 0.21                 | 0.83                         | 0.93                           |
| KM04_HOP_05 | -0.19                   | -0.13                   | 1.45                          | 0.29                 | 1.15                         | 0.88                           |
| KM04_HOP_06 | -0.37                   | -0.20                   | 1.86                          | 0.56                 | 2.17                         | 0.96                           |
| KM04_HOP_07 | -0.29                   | -0.13                   | 2.32                          | 0.43                 | 1.66                         | 1.02                           |
| KM04_HOP_08 | -0.18                   | -0.06                   | 2.88                          | 0.25                 | 1.05                         | 0.86                           |
| KM04_HOP_09 | -0.21                   | -0.18                   | 1.13                          | 0.33                 | 1.38                         | 0.90                           |
| KM04_HOP_10 | -0.15                   | -0.14                   | 1.07                          | 0.24                 | 0.98                         | 0.81                           |
| KM04_HOP_11 | -0.18                   | -0.19                   | 0.92                          | 0.29                 | 1.19                         | 0.90                           |
| KM04_HOP_12 | -0.16                   | -0.11                   | 1.45                          | 0.26                 | 1.07                         | 1.00                           |
| KM04_HOP_13 | -0.30                   | -0.16                   | 1.90                          | 0.45                 | 1.87                         | 0.94                           |
| KM04_HOP_14 | -0.34                   | -0.21                   | 1.64                          | 0.52                 | 2.15                         | 1.02                           |
| KM04_HOP_15 | -0.40                   | -0.19                   | 2.10                          | 0.59                 | 2.46                         | 1.00                           |
| KM05_HOP_01 | -0.33                   | -0.26                   | 1.29                          | 0.53                 | 1.56                         | 0.99                           |
| KM05_HOP_02 | -0.18                   | -0.19                   | 0.94                          | 0.31                 | 0.91                         | 0.99                           |
| KM05_HOP_03 | -0.30                   | -0.25                   | 1.18                          | 0.49                 | 1.43                         | 1.02                           |
| KM05_HOP_04 | -0.20                   | -0.17                   | 1.15                          | 0.31                 | 0.92                         | 0.91                           |
| KM05_HOP_05 | -0.32                   | -0.20                   | 1.56                          | 0.50                 | 1.46                         | 0.99                           |
| KM05_HOP_06 | -0.24                   | -0.17                   | 1.41                          | 0.38                 | 1.13                         | 0.98                           |
| KM05_HOP_07 | -0.41                   | -0.26                   | 1.58                          | 0.62                 | 1.83                         | 1.06                           |
| KM05_HOP_08 | -0.46                   | -0.17                   | 2.65                          | 0.66                 | 1.96                         | 0.98                           |
| KM06_HOP_01 | -0.17                   | -0.22                   | 0.76                          | 0.31                 | 1.11                         | 0.89                           |
| KM06_HOP_02 | -0.33                   | -0.21                   | 1.58                          | 0.49                 | 1.78                         | 0.89                           |
| KM06_HOP_03 | -0.20                   | -0.20                   | 0.97                          | 0.34                 | 1.22                         | 0.96                           |
| KM06_HOP_04 | -0.20                   | -0.23                   | 0.85                          | 0.37                 | 1.33                         | 0.99                           |

Table S2 (cont.)

| <b>Trial</b>       | <b>Peak Vertical Force (N)</b> | <b>Peak Fore-Aft Force (N)</b> | <b>Vertical/Fore-aft Force Ratio</b> | <b>Peak Total Force (N)</b> | <b>% Body Weight of Total Force</b> | <b>Vertical/Horizontal Time Ratio</b> |
|--------------------|--------------------------------|--------------------------------|--------------------------------------|-----------------------------|-------------------------------------|---------------------------------------|
| <i>KM06_HOP_05</i> | -0.16                          | -0.19                          | 0.84                                 | 0.30                        | 1.07                                | 1.02                                  |
| <i>KM06_HOP_06</i> | -0.32                          | -0.18                          | 1.79                                 | 0.48                        | 1.75                                | 0.97                                  |
| <i>KM06_HOP_07</i> | -0.19                          | -0.23                          | 0.82                                 | 0.35                        | 1.27                                | 0.98                                  |
| <i>KM06_HOP_08</i> | -0.22                          | -0.17                          | 1.30                                 | 0.35                        | 1.26                                | 1.00                                  |
| <i>KM06_HOP_09</i> | -0.30                          | -0.19                          | 1.60                                 | 0.46                        | 1.66                                | 0.93                                  |
| <i>KM06_HOP_10</i> | -0.35                          | -0.15                          | 2.30                                 | 0.51                        | 1.86                                | 0.94                                  |
| <i>KM06_HOP_11</i> | -0.34                          | -0.20                          | 1.65                                 | 0.52                        | 1.88                                | 0.98                                  |
| <i>KM06_HOP_12</i> | -0.41                          | -0.25                          | 1.61                                 | 0.60                        | 2.20                                | 0.91                                  |
| <i>KM06_HOP_13</i> | -0.36                          | -0.17                          | 2.13                                 | 0.54                        | 1.97                                | 1.00                                  |
| <i>KM06_HOP_14</i> | -0.38                          | -0.16                          | 2.30                                 | 0.55                        | 2.01                                | 0.96                                  |
| <i>KM06_HOP_15</i> | -0.35                          | -0.21                          | 1.62                                 | 0.53                        | 1.94                                | 1.02                                  |

Table S2 (cont.)

| Trial       | Peak Velocity (ms <sup>-1</sup> ) | Peak Velocity (SVL) | Peak Acceleration (ms <sup>-2</sup> ) | Angle at Take-off (°) | Jump Distance (m) |
|-------------|-----------------------------------|---------------------|---------------------------------------|-----------------------|-------------------|
| KM03_HOP_01 | 0.84                              | 14.52               | 27.54                                 | 7.03                  | 0.07              |
| KM03_HOP_02 | 0.92                              | 15.80               | 22.62                                 | 8.53                  | 0.05              |
| KM03_HOP_03 | 0.80                              | 13.84               | 22.01                                 | 6.65                  | 0.06              |
| KM03_HOP_04 | 1.11                              | 19.12               | 30.90                                 | 35.34                 | 0.11              |
| KM03_HOP_05 | 1.70                              | 29.28               | 49.43                                 | 69.18                 | 0.21              |
| KM03_HOP_06 | 1.46                              | 25.23               | 36.03                                 | 63.15                 | 0.17              |
| KM03_HOP_07 | 1.46                              | 25.21               | 28.66                                 | 58.29                 | 0.22              |
| KM03_HOP_08 | 1.34                              | 23.05               | 25.06                                 | 54.13                 | 0.16              |
| KM03_HOP_09 | 1.65                              | 28.43               | 34.81                                 | 59.94                 | 0.27              |
| KM03_HOP_10 | 0.85                              | 14.67               | 45.08                                 | 7.43                  | 0.08              |
| KM03_HOP_11 | 1.14                              | 19.64               | 36.37                                 | 23.13                 | 0.12              |
| KM03_HOP_12 | 1.15                              | 19.87               | 32.50                                 | 19.56                 | 0.14              |
| KM04_HOP_01 | 1.34                              | 22.72               | 28.69                                 | 46.44                 | 0.21              |
| KM04_HOP_02 | 1.26                              | 21.27               | 25.96                                 | 5.63                  | 0.05              |
| KM04_HOP_03 | 1.18                              | 19.99               | 23.70                                 | 23.93                 | 0.17              |
| KM04_HOP_04 | 0.99                              | 16.77               | 15.65                                 | 0.27                  | 0.08              |
| KM04_HOP_05 | 1.29                              | 21.79               | 21.14                                 | 34.09                 | 0.19              |
| KM04_HOP_06 | 1.72                              | 29.16               | 40.09                                 | 52.70                 | 0.30              |
| KM04_HOP_07 | 1.46                              | 24.67               | 32.26                                 | 53.77                 | 0.24              |
| KM04_HOP_08 | 0.67                              | 10.98               | 35.52                                 | 20.81                 | 0.03              |
| KM04_HOP_09 | 1.25                              | 20.50               | 22.96                                 | 23.37                 | 0.17              |
| KM04_HOP_10 | 1.14                              | 18.76               | 19.22                                 | 14.20                 | 0.14              |
| KM04_HOP_11 | 1.32                              | 21.58               | 23.19                                 | 10.84                 | 0.13              |
| KM04_HOP_12 | 0.83                              | 13.63               | 32.76                                 | 1.52                  | 0.07              |
| KM04_HOP_13 | 1.44                              | 23.69               | 47.85                                 | 50.07                 | 0.23              |
| KM04_HOP_14 | 1.84                              | 30.22               | 46.61                                 | 57.20                 | 0.32              |
| KM04_HOP_15 | 2.02                              | 33.07               | 53.94                                 | 60.45                 | 0.34              |
| KM05_HOP_01 | 1.50                              | 24.61               | 29.99                                 | 23.41                 | 0.20              |
| KM05_HOP_02 | 1.35                              | 22.14               | 31.39                                 | 28.23                 | 0.22              |
| KM05_HOP_03 | 1.71                              | 28.07               | 46.34                                 | 41.48                 | 0.32              |
| KM05_HOP_04 | 1.11                              | 18.23               | 19.39                                 | 7.02                  | 0.11              |
| KM05_HOP_05 | 1.60                              | 26.30               | 35.16                                 | 47.46                 | 0.29              |
| KM05_HOP_06 | 1.29                              | 21.12               | 28.70                                 | 34.09                 | 0.18              |
| KM05_HOP_07 | 1.47                              | 24.15               | 36.34                                 | 51.09                 | 0.25              |
| KM05_HOP_08 | 1.73                              | 28.29               | 79.48                                 | 53.08                 | 0.34              |
| KM06_HOP_01 | 1.39                              | 22.82               | 35.18                                 | 16.49                 | 0.17              |
| KM06_HOP_02 | 1.61                              | 26.37               | 43.95                                 | 34.46                 | 0.29              |
| KM06_HOP_03 | 1.22                              | 20.02               | 28.10                                 | 20.51                 | 0.13              |
| KM06_HOP_04 | 1.49                              | 24.40               | 29.41                                 | 24.62                 | 0.23              |
| KM06_HOP_05 | 1.33                              | 21.85               | 53.10                                 | 17.80                 | 0.11              |
| KM06_HOP_06 | 1.39                              | 22.83               | 31.99                                 | 40.39                 | 0.24              |
| KM06_HOP_07 | 1.43                              | 23.41               | 43.60                                 | 27.67                 | 0.20              |
| KM06_HOP_08 | 1.33                              | 21.79               | 69.22                                 | 33.37                 | 0.19              |

**Table S2 (cont.)**

| <b>Trial</b>       | <b>Peak Velocity (m/s)</b> | <b>Peak Velocity (SVL)</b> | <b>Peak Acceleration (m/s<sup>2</sup>)</b> | <b>Angle at Take-off (°)</b> | <b>Jump Distance (m)</b> |
|--------------------|----------------------------|----------------------------|--------------------------------------------|------------------------------|--------------------------|
| <i>KM06_HOP_09</i> | 1.45                       | 23.83                      | 34.71                                      | 44.31                        | 0.25                     |
| <i>KM06_HOP_10</i> | 1.51                       | 24.77                      | 42.06                                      | 47.90                        | 0.28                     |
| <i>KM06_HOP_11</i> | 1.61                       | 26.42                      | 42.04                                      | 46.40                        | 0.31                     |
| <i>KM06_HOP_12</i> | 1.60                       | 26.18                      | 42.09                                      | 44.70                        | 0.28                     |
| <i>KM06_HOP_13</i> | 1.40                       | 22.88                      | 43.74                                      | 46.43                        | 0.23                     |
| <i>KM06_HOP_14</i> | 1.56                       | 25.58                      | 34.49                                      | 51.00                        | 0.27                     |
| <i>KM06_HOP_15</i> | 1.64                       | 26.81                      | 36.89                                      | 44.48                        | 0.31                     |

Table S2 (cont.)

| Trial       | Ankle Range (°) | Ankle Min (°) | Ankle Max (°) | Knee Range (°) | Knee Min (°) | Knee Max (°) |
|-------------|-----------------|---------------|---------------|----------------|--------------|--------------|
| KM03_HOP_01 | 77.96           | 47.88         | 125.84        | 87.94          | 34.38        | 122.32       |
| KM03_HOP_02 | 85.37           | 43.51         | 128.88        | 76.69          | 37.64        | 114.33       |
| KM03_HOP_03 | 81.38           | 50.33         | 131.72        | 90.00          | 31.99        | 121.99       |
| KM03_HOP_04 | 95.64           | 53.05         | 148.69        | 113.51         | 28.30        | 141.81       |
| KM03_HOP_05 | 111.84          | 42.33         | 154.17        | 126.50         | 29.82        | 156.32       |
| KM03_HOP_06 | 106.19          | 42.95         | 149.14        | 116.95         | 33.92        | 150.87       |
| KM03_HOP_07 | 115.48          | 35.46         | 150.94        | 122.76         | 32.04        | 154.80       |
| KM03_HOP_08 | 118.04          | 38.80         | 156.85        | 121.94         | 32.48        | 154.43       |
| KM03_HOP_09 | 91.78           | 57.98         | 149.75        | 88.78          | 23.45        | 112.24       |
| KM03_HOP_10 | 81.77           | 61.04         | 142.81        | 77.44          | 18.49        | 95.93        |
| KM03_HOP_11 | 83.64           | 59.14         | 142.79        | 94.01          | 18.14        | 112.14       |
| KM03_HOP_12 | 94.68           | 50.70         | 145.39        | 94.17          | 18.76        | 112.93       |
| KM04_HOP_01 | 114.47          | 48.60         | 163.07        | 125.38         | 37.11        | 162.49       |
| KM04_HOP_02 | 113.04          | 41.68         | 154.71        | 90.00          | 49.99        | 139.99       |
| KM04_HOP_03 | 116.63          | 38.55         | 155.18        | 94.73          | 59.25        | 153.98       |
| KM04_HOP_04 | 96.05           | 45.06         | 141.11        | 86.45          | 47.65        | 134.09       |
| KM04_HOP_05 | 112.35          | 46.05         | 158.40        | 108.07         | 40.17        | 148.24       |
| KM04_HOP_06 | 119.51          | 42.04         | 161.54        | 121.73         | 39.93        | 161.66       |
| KM04_HOP_07 | 114.19          | 44.97         | 159.16        | 117.58         | 36.22        | 153.80       |
| KM04_HOP_08 | 90.99           | 38.60         | 129.59        | 89.99          | 38.55        | 128.54       |
| KM04_HOP_09 | 108.62          | 31.88         | 140.50        | 111.41         | 35.99        | 147.40       |
| KM04_HOP_10 | 91.21           | 46.92         | 138.14        | 107.50         | 29.28        | 136.78       |
| KM04_HOP_11 | 94.33           | 43.38         | 137.71        | 103.34         | 34.38        | 137.72       |
| KM04_HOP_12 | 87.86           | 43.74         | 131.59        | 100.27         | 33.99        | 134.26       |
| KM04_HOP_13 | 91.67           | 49.51         | 141.18        | 123.09         | 27.85        | 150.93       |
| KM04_HOP_14 | 89.09           | 49.97         | 139.06        | 121.13         | 30.02        | 151.16       |
| KM04_HOP_15 | 93.58           | 50.20         | 143.78        | 120.24         | 32.47        | 152.71       |
| KM05_HOP_01 | 102.56          | 46.56         | 149.11        | 112.30         | 32.99        | 145.30       |
| KM05_HOP_02 | 105.56          | 42.71         | 148.27        | 113.36         | 29.94        | 143.30       |
| KM05_HOP_03 | 101.90          | 49.51         | 151.42        | 111.77         | 28.63        | 140.40       |
| KM05_HOP_04 | 97.80           | 40.04         | 137.84        | 92.43          | 31.32        | 123.75       |
| KM05_HOP_05 | 95.64           | 50.38         | 146.02        | 114.37         | 28.49        | 142.86       |
| KM05_HOP_06 | 101.82          | 40.83         | 142.65        | 113.81         | 26.61        | 140.42       |
| KM05_HOP_07 | 103.38          | 50.89         | 154.27        | 123.57         | 29.31        | 152.88       |
| KM05_HOP_08 | 100.78          | 51.31         | 152.09        | 116.74         | 38.47        | 155.21       |
| KM06_HOP_01 | 94.52           | 52.70         | 147.22        | 110.65         | 30.00        | 140.65       |
| KM06_HOP_02 | 111.65          | 45.83         | 157.48        | 114.15         | 33.93        | 148.08       |
| KM06_HOP_03 | 95.49           | 52.35         | 147.84        | 102.57         | 39.82        | 142.39       |
| KM06_HOP_04 | 97.61           | 56.45         | 154.06        | 114.87         | 30.71        | 145.58       |
| KM06_HOP_05 | 101.47          | 49.03         | 150.50        | 112.66         | 29.49        | 142.14       |
| KM06_HOP_06 | 109.52          | 43.38         | 152.90        | 113.57         | 33.24        | 146.82       |
| KM06_HOP_07 | 100.99          | 49.04         | 150.03        | 115.09         | 29.00        | 144.09       |
| KM06_HOP_08 | 100.07          | 53.97         | 154.04        | 88.47          | 51.32        | 139.79       |

**Table S2 (cont.)**

| <b>Trial</b>       | <b>Ankle Range (°)</b> | <b>Ankle Min (°)</b> | <b>Ankle Max (°)</b> | <b>Knee Range (°)</b> | <b>Knee Min (°)</b> | <b>Knee Max (°)</b> |
|--------------------|------------------------|----------------------|----------------------|-----------------------|---------------------|---------------------|
| <i>KM06_HOP_09</i> | 101.48                 | 49.98                | 151.46               | 116.45                | 30.14               | 146.58              |
| <i>KM06_HOP_10</i> | 110.56                 | 45.47                | 156.02               | 111.86                | 27.65               | 139.50              |
| <i>KM06_HOP_11</i> | 92.82                  | 48.41                | 141.24               | 113.31                | 32.96               | 146.27              |
| <i>KM06_HOP_12</i> | 107.42                 | 46.36                | 153.78               | 105.66                | 27.87               | 133.54              |
| <i>KM06_HOP_13</i> | 110.43                 | 48.82                | 159.25               | 114.03                | 29.92               | 143.96              |
| <i>KM06_HOP_14</i> | 115.70                 | 41.24                | 156.94               | 118.60                | 25.98               | 144.58              |
| <i>KM06_HOP_15</i> | 109.87                 | 45.07                | 154.94               | 115.88                | 29.53               | 145.41              |

Table S2 (cont.)

| Trial       | Hip Range (°) | Hip Min (°) | Hip Max (°) | Sacroiliac Range (°) | Sacroiliac Min (°) | Sacroiliac Max (°) |
|-------------|---------------|-------------|-------------|----------------------|--------------------|--------------------|
| KM03_HOP_01 | 74.02         | 62.97       | 136.99      | 19.07                | 146.45             | 165.52             |
| KM03_HOP_02 | 74.65         | 56.57       | 131.22      | 9.16                 | 148.67             | 157.84             |
| KM03_HOP_03 | 79.33         | 59.42       | 138.76      | 15.16                | 151.01             | 166.17             |
| KM03_HOP_04 | 88.43         | 51.92       | 140.35      | 24.08                | 138.12             | 162.20             |
| KM03_HOP_05 | 96.86         | 49.64       | 146.50      | 23.43                | 140.04             | 163.47             |
| KM03_HOP_06 | 91.23         | 56.01       | 147.24      | 29.02                | 137.70             | 166.72             |
| KM03_HOP_07 | 102.83        | 43.80       | 146.63      | 28.42                | 136.98             | 165.39             |
| KM03_HOP_08 | 101.55        | 44.90       | 146.45      | 27.65                | 137.24             | 164.89             |
| KM03_HOP_09 | 61.64         | 39.51       | 101.16      | 23.03                | 146.24             | 169.27             |
| KM03_HOP_10 | 62.22         | 52.99       | 115.21      | 22.72                | 143.85             | 166.57             |
| KM03_HOP_11 | 69.88         | 45.83       | 115.71      | 19.76                | 145.90             | 165.66             |
| KM03_HOP_12 | 79.33         | 39.57       | 118.90      | 20.96                | 140.60             | 161.56             |
| KM04_HOP_01 | 96.04         | 50.04       | 146.08      | 17.49                | 133.13             | 150.62             |
| KM04_HOP_02 | 97.37         | 47.35       | 144.72      | 24.42                | 129.46             | 153.89             |
| KM04_HOP_03 | 83.61         | 56.06       | 139.67      | 14.65                | 137.92             | 152.57             |
| KM04_HOP_04 | 71.71         | 70.54       | 142.25      | 10.35                | 145.59             | 155.93             |
| KM04_HOP_05 | 73.63         | 71.08       | 144.71      | 6.21                 | 144.39             | 150.60             |
| KM04_HOP_06 | 97.54         | 54.30       | 151.84      | 16.29                | 144.72             | 161.01             |
| KM04_HOP_07 | 86.35         | 63.05       | 149.40      | 17.89                | 143.29             | 161.18             |
| KM04_HOP_08 | 63.86         | 87.38       | 151.24      | 14.84                | 145.61             | 160.44             |
| KM04_HOP_09 | 87.16         | 65.30       | 152.46      | 14.23                | 143.14             | 157.37             |
| KM04_HOP_10 | 72.39         | 86.40       | 158.80      | 14.47                | 147.63             | 162.10             |
| KM04_HOP_11 | 90.04         | 76.05       | 166.09      | 28.31                | 138.53             | 166.84             |
| KM04_HOP_12 | 87.75         | 62.72       | 150.47      | 10.66                | 145.79             | 156.45             |
| KM04_HOP_13 | 93.09         | 66.65       | 159.74      | 12.27                | 147.58             | 159.84             |
| KM04_HOP_14 | 94.00         | 64.83       | 158.83      | 12.97                | 141.78             | 154.75             |
| KM04_HOP_15 | 97.01         | 63.81       | 160.81      | 25.64                | 141.85             | 167.49             |
| KM05_HOP_01 | 89.33         | 49.35       | 138.68      | 19.16                | 146.88             | 166.03             |
| KM05_HOP_02 | 83.05         | 56.21       | 139.25      | 16.04                | 143.96             | 160.00             |
| KM05_HOP_03 | 83.91         | 51.69       | 135.60      | 24.41                | 147.89             | 172.30             |
| KM05_HOP_04 | 68.41         | 61.57       | 129.98      | 16.63                | 143.97             | 160.60             |
| KM05_HOP_05 | 80.51         | 61.89       | 142.41      | 22.80                | 149.72             | 172.51             |
| KM05_HOP_06 | 83.28         | 52.07       | 135.35      | 17.69                | 148.39             | 166.08             |
| KM05_HOP_07 | 90.43         | 56.97       | 147.41      | 28.91                | 144.91             | 173.81             |
| KM05_HOP_08 | 92.76         | 58.55       | 151.31      | 19.29                | 152.64             | 171.93             |
| KM06_HOP_01 | 78.08         | 55.40       | 133.48      | 6.49                 | 153.81             | 160.31             |
| KM06_HOP_02 | 87.12         | 54.72       | 141.84      | 14.72                | 149.34             | 164.06             |
| KM06_HOP_03 | 86.91         | 44.58       | 131.49      | 13.86                | 145.38             | 159.24             |
| KM06_HOP_04 | 76.99         | 61.16       | 138.15      | 16.64                | 146.31             | 162.95             |
| KM06_HOP_05 | 72.53         | 60.92       | 133.44      | 17.16                | 141.91             | 159.07             |
| KM06_HOP_06 | 85.74         | 50.89       | 136.63      | 19.02                | 149.23             | 168.25             |
| KM06_HOP_07 | 80.81         | 59.35       | 140.16      | 12.15                | 149.99             | 162.14             |
| KM06_HOP_08 | 76.24         | 53.23       | 129.48      | 19.18                | 139.88             | 159.06             |



**Table S2 (cont.)**

| <b>Trial</b>       | <b>Hip Range<br/>(°)</b> | <b>Hip Min (°)</b> | <b>Hip Max (°)</b> | <b>Sacroiliac<br/>Range (°)</b> | <b>Sacroiliac<br/>Min (°)</b> | <b>Sacroiliac<br/>Max (°)</b> |
|--------------------|--------------------------|--------------------|--------------------|---------------------------------|-------------------------------|-------------------------------|
| <i>KM06_HOP_09</i> | 85.01                    | 56.42              | 141.43             | 24.19                           | 142.65                        | 166.83                        |
| <i>KM06_HOP_10</i> | 86.04                    | 48.59              | 134.63             | 23.10                           | 145.75                        | 168.85                        |
| <i>KM06_HOP_11</i> | 87.20                    | 49.87              | 137.07             | 15.70                           | 153.89                        | 169.59                        |
| <i>KM06_HOP_12</i> | 84.27                    | 46.11              | 130.39             | 17.11                           | 152.34                        | 169.45                        |
| <i>KM06_HOP_13</i> | 91.92                    | 46.55              | 138.47             | 24.12                           | 146.03                        | 170.15                        |
| <i>KM06_HOP_14</i> | 92.31                    | 44.88              | 137.19             | 27.68                           | 140.45                        | 168.13                        |
| <i>KM06_HOP_15</i> | 97.02                    | 39.06              | 136.08             | 17.58                           | 148.95                        | 166.53                        |

Table S2 (cont.)

| Trial       | Sacroiliac Take-off (°) | Body Range (°) | Body Min (°) | Body Max (°) | Body Take-off (°) |
|-------------|-------------------------|----------------|--------------|--------------|-------------------|
| KM03_HOP_01 | 162.93                  | 17.18          | 6.56         | 23.73        | 23.59             |
| KM03_HOP_02 | 156.41                  | 10.09          | 2.44         | 12.53        | 2.44              |
| KM03_HOP_03 | 165.71                  | 19.41          | 11.73        | 31.14        | 31.14             |
| KM03_HOP_04 | 160.35                  | 20.90          | 10.60        | 31.51        | 30.13             |
| KM03_HOP_05 | 162.67                  | 38.62          | 17.68        | 56.30        | 55.21             |
| KM03_HOP_06 | 164.91                  | 29.21          | 30.65        | 59.85        | 59.85             |
| KM03_HOP_07 | 165.23                  | 30.88          | 23.20        | 54.08        | 53.78             |
| KM03_HOP_08 | 159.76                  | 32.20          | 20.34        | 52.54        | 52.54             |
| KM03_HOP_09 | 168.51                  | 19.53          | 20.98        | 40.51        | 38.85             |
| KM03_HOP_10 | 166.21                  | 7.12           | 14.06        | 21.18        | 19.08             |
| KM03_HOP_11 | 158.80                  | 9.01           | 12.05        | 21.06        | 14.85             |
| KM03_HOP_12 | 157.39                  | 7.17           | 13.32        | 20.49        | 13.32             |
| KM04_HOP_01 | 149.05                  | 9.32           | 23.17        | 32.49        | 23.17             |
| KM04_HOP_02 | 150.07                  | 6.68           | 0.08         | 6.76         | 2.52              |
| KM04_HOP_03 | 151.22                  | 10.28          | 8.52         | 18.79        | 8.52              |
| KM04_HOP_04 | 154.70                  | 13.47          | 0.57         | 14.04        | 6.02              |
| KM04_HOP_05 | 150.60                  | 8.35           | 21.05        | 29.40        | 21.05             |
| KM04_HOP_06 | 160.10                  | 21.71          | 22.95        | 44.67        | 42.06             |
| KM04_HOP_07 | 158.74                  | 23.14          | 26.58        | 49.72        | 45.93             |
| KM04_HOP_08 | 152.84                  | 8.94           | 15.29        | 24.23        | 15.29             |
| KM04_HOP_09 | 156.03                  | 8.39           | 15.86        | 24.24        | 17.64             |
| KM04_HOP_10 | 159.31                  | 8.50           | 16.95        | 25.45        | 24.51             |
| KM04_HOP_11 | 166.43                  | 9.34           | 7.08         | 16.42        | 13.76             |
| KM04_HOP_12 | 156.45                  | 8.68           | 12.57        | 21.25        | 12.57             |
| KM04_HOP_13 | 154.55                  | 23.60          | 23.71        | 47.31        | 45.17             |
| KM04_HOP_14 | 153.75                  | 22.45          | 27.52        | 49.97        | 46.96             |
| KM04_HOP_15 | 167.00                  | 30.91          | 27.79        | 58.70        | 56.98             |
| KM05_HOP_01 | 159.02                  | 9.78           | 12.04        | 21.82        | 16.15             |
| KM05_HOP_02 | 159.37                  | 8.72           | 11.34        | 20.06        | 12.24             |
| KM05_HOP_03 | 164.34                  | 13.38          | 17.11        | 30.49        | 25.47             |
| KM05_HOP_04 | 158.66                  | 9.31           | 2.30         | 11.61        | 2.30              |
| KM05_HOP_05 | 172.51                  | 18.18          | 23.43        | 41.61        | 39.92             |
| KM05_HOP_06 | 164.59                  | 8.09           | 18.71        | 26.81        | 24.18             |
| KM05_HOP_07 | 169.03                  | 32.36          | 15.39        | 47.75        | 42.14             |
| KM05_HOP_08 | 170.31                  | 20.75          | 25.96        | 46.71        | 44.70             |
| KM06_HOP_01 | 158.68                  | 12.58          | 3.77         | 16.34        | 3.77              |
| KM06_HOP_02 | 162.89                  | 3.63           | 23.36        | 26.99        | 23.60             |
| KM06_HOP_03 | 153.90                  | 16.30          | 2.06         | 18.36        | 2.06              |
| KM06_HOP_04 | 162.95                  | 11.96          | 9.31         | 21.27        | 9.31              |
| KM06_HOP_05 | 156.13                  | 13.54          | 2.57         | 16.11        | 2.57              |
| KM06_HOP_06 | 163.47                  | 14.24          | 19.38        | 33.61        | 25.61             |
| KM06_HOP_07 | 162.14                  | 7.68           | 14.34        | 22.02        | 14.34             |
| KM06_HOP_08 | 158.27                  | 9.54           | 17.66        | 27.21        | 17.66             |

**Table S2 (cont.)**

| <b>Trial</b>       | <b>Sacroiliac<br/>Take-off (°)</b> | <b>Body<br/>Range (°)</b> | <b>Body Min (°)</b> | <b>Body Max<br/>(°)</b> | <b>Body Take-<br/>off (°)</b> |
|--------------------|------------------------------------|---------------------------|---------------------|-------------------------|-------------------------------|
| <i>KM06_HOP_09</i> | 161.50                             | 20.86                     | 14.95               | 35.81                   | 29.29                         |
| <i>KM06_HOP_10</i> | 164.68                             | 17.60                     | 24.97               | 42.57                   | 37.10                         |
| <i>KM06_HOP_11</i> | 164.48                             | 16.69                     | 23.09               | 39.78                   | 33.02                         |
| <i>KM06_HOP_12</i> | 165.20                             | 13.13                     | 24.98               | 38.11                   | 33.78                         |
| <i>KM06_HOP_13</i> | 168.47                             | 19.91                     | 25.44               | 45.35                   | 43.75                         |
| <i>KM06_HOP_14</i> | 165.91                             | 19.41                     | 25.49               | 44.90                   | 43.26                         |
| <i>KM06_HOP_15</i> | 162.52                             | 16.52                     | 21.36               | 37.87                   | 34.34                         |

Table S2 (cont.)

| <b>Trial</b>       | <b>TMT Max<br/>Moment<br/>Arm (m)</b> | <b>Ankle Max<br/>Moment<br/>Arm (m)</b> | <b>Knee Max<br/>Moment<br/>Arm (m)</b> | <b>Hip Max<br/>Moment<br/>Arm (m)</b> |
|--------------------|---------------------------------------|-----------------------------------------|----------------------------------------|---------------------------------------|
| <i>KM03_HOP_01</i> | 0.023                                 | 0.032                                   | 0.042                                  | 0.058                                 |
| <i>KM03_HOP_02</i> | 0.019                                 | 0.027                                   | 0.044                                  | 0.060                                 |
| <i>KM03_HOP_03</i> | 0.023                                 | 0.029                                   | 0.036                                  | 0.047                                 |
| <i>KM03_HOP_04</i> | 0.012                                 | 0.013                                   | 0.019                                  | 0.014                                 |
| <i>KM03_HOP_05</i> | 0.009                                 | 0.011                                   | 0.019                                  | 0.015                                 |
| <i>KM03_HOP_06</i> | 0.015                                 | 0.024                                   | 0.046                                  | 0.063                                 |
| <i>KM03_HOP_07</i> | 0.022                                 | 0.031                                   | 0.047                                  | 0.064                                 |
| <i>KM03_HOP_08</i> | 0.013                                 | 0.016                                   | 0.015                                  | 0.020                                 |
| <i>KM03_HOP_09</i> | 0.014                                 | 0.016                                   | 0.016                                  | 0.019                                 |
| <i>KM03_HOP_10</i> | 0.021                                 | 0.029                                   | 0.041                                  | 0.055                                 |
| <i>KM03_HOP_11</i> | 0.019                                 | 0.021                                   | 0.033                                  | 0.037                                 |
| <i>KM03_HOP_12</i> | 0.014                                 | 0.014                                   | 0.032                                  | 0.034                                 |
| <i>KM04_HOP_01</i> | 0.018                                 | 0.023                                   | 0.025                                  | 0.032                                 |
| <i>KM04_HOP_02</i> | 0.024                                 | 0.033                                   | 0.050                                  | 0.071                                 |
| <i>KM04_HOP_03</i> | 0.021                                 | 0.029                                   | 0.043                                  | 0.058                                 |
| <i>KM04_HOP_04</i> | 0.018                                 | 0.021                                   | 0.032                                  | 0.044                                 |
| <i>KM04_HOP_05</i> | 0.015                                 | 0.017                                   | 0.018                                  | 0.023                                 |
| <i>KM04_HOP_06</i> | 0.014                                 | 0.017                                   | 0.018                                  | 0.023                                 |
| <i>KM04_HOP_07</i> | 0.012                                 | 0.014                                   | 0.034                                  | 0.047                                 |
| <i>KM04_HOP_08</i> | 0.013                                 | 0.021                                   | 0.035                                  | 0.054                                 |
| <i>KM04_HOP_09</i> | 0.022                                 | 0.026                                   | 0.041                                  | 0.059                                 |
| <i>KM04_HOP_10</i> | 0.014                                 | 0.018                                   | 0.026                                  | 0.038                                 |
| <i>KM04_HOP_11</i> | 0.015                                 | 0.023                                   | 0.043                                  | 0.062                                 |
| <i>KM04_HOP_12</i> | 0.023                                 | 0.031                                   | 0.037                                  | 0.050                                 |
| <i>KM04_HOP_13</i> | 0.011                                 | 0.016                                   | 0.019                                  | 0.020                                 |
| <i>KM04_HOP_14</i> | 0.008                                 | 0.013                                   | 0.018                                  | 0.012                                 |
| <i>KM04_HOP_15</i> | 0.007                                 | 0.012                                   | 0.019                                  | 0.016                                 |
| <i>KM05_HOP_01</i> | 0.015                                 | 0.017                                   | 0.025                                  | 0.027                                 |
| <i>KM05_HOP_02</i> | 0.024                                 | 0.037                                   | 0.058                                  | 0.074                                 |
| <i>KM05_HOP_03</i> | 0.016                                 | 0.019                                   | 0.019                                  | 0.021                                 |
| <i>KM05_HOP_04</i> | 0.022                                 | 0.028                                   | 0.026                                  | 0.033                                 |
| <i>KM05_HOP_05</i> | 0.016                                 | 0.021                                   | 0.019                                  | 0.026                                 |
| <i>KM05_HOP_06</i> | 0.023                                 | 0.032                                   | 0.040                                  | 0.052                                 |
| <i>KM05_HOP_07</i> | 0.018                                 | 0.022                                   | 0.022                                  | 0.030                                 |
| <i>KM05_HOP_08</i> | 0.014                                 | 0.017                                   | 0.017                                  | 0.015                                 |
| <i>KM06_HOP_01</i> | 0.022                                 | 0.031                                   | 0.054                                  | 0.069                                 |
| <i>KM06_HOP_02</i> | 0.018                                 | 0.028                                   | 0.052                                  | 0.067                                 |
| <i>KM06_HOP_03</i> | 0.021                                 | 0.031                                   | 0.052                                  | 0.067                                 |
| <i>KM06_HOP_04</i> | 0.022                                 | 0.032                                   | 0.048                                  | 0.062                                 |
| <i>KM06_HOP_05</i> | 0.023                                 | 0.033                                   | 0.053                                  | 0.069                                 |
| <i>KM06_HOP_06</i> | 0.022                                 | 0.032                                   | 0.051                                  | 0.066                                 |
| <i>KM06_HOP_07</i> | 0.012                                 | 0.016                                   | 0.021                                  | 0.029                                 |
| <i>KM06_HOP_08</i> | 0.016                                 | 0.027                                   | 0.050                                  | 0.068                                 |

**Table S2 (cont.)**

| <b>Trial</b>       | <b>TMT Max<br/>Moment<br/>Arm (m)</b> | <b>Ankle Max<br/>Moment<br/>Arm (m)</b> | <b>Knee Max<br/>Moment<br/>Arm (m)</b> | <b>Hip Max<br/>Moment<br/>Arm (m)</b> |
|--------------------|---------------------------------------|-----------------------------------------|----------------------------------------|---------------------------------------|
| <i>KM06_HOP_09</i> | 0.010                                 | 0.015                                   | 0.018                                  | 0.018                                 |
| <i>KM06_HOP_10</i> | 0.012                                 | 0.015                                   | 0.016                                  | 0.020                                 |
| <i>KM06_HOP_11</i> | 0.018                                 | 0.024                                   | 0.030                                  | 0.041                                 |
| <i>KM06_HOP_12</i> | 0.011                                 | 0.017                                   | 0.016                                  | 0.022                                 |
| <i>KM06_HOP_13</i> | 0.018                                 | 0.022                                   | 0.023                                  | 0.032                                 |
| <i>KM06_HOP_14</i> | 0.018                                 | 0.029                                   | 0.049                                  | 0.065                                 |
| <i>KM06_HOP_15</i> | 0.020                                 | 0.031                                   | 0.050                                  | 0.066                                 |

Table S2 (cont.)

| Trial       | TMT 3D<br>Max<br>Torque<br>(N.m) | Ankle 3D<br>Max<br>Torque<br>(N.m) | Knee 3D<br>Max Torque<br>(N.m) | Hip 3D<br>Max<br>Torque<br>(N.m) | TMT XY<br>Max<br>Torque<br>(N.m) | Ankle XY<br>Max<br>Torque<br>(N.m) |
|-------------|----------------------------------|------------------------------------|--------------------------------|----------------------------------|----------------------------------|------------------------------------|
| KM03_HOP_01 | 0.001906                         | 0.002583                           | 0.003091                       | 0.001072                         | 0.001781                         | 0.001218                           |
| KM03_HOP_02 | 0.001578                         | 0.002139                           | 0.003083                       | 0.001159                         | 0.001454                         | 0.001353                           |
| KM03_HOP_03 | 0.002008                         | 0.002813                           | 0.003204                       | 0.001625                         | 0.001494                         | -0.0002                            |
| KM03_HOP_04 | 0.002673                         | 0.003489                           | 0.003622                       | 0.001641                         | 0.001751                         | 0.002016                           |
| KM03_HOP_05 | 0.001693                         | 0.003172                           | 0.004581                       | 0.004374                         | 0.001484                         | 0.002815                           |
| KM03_HOP_06 | 0.002157                         | 0.002662                           | 0.003491                       | 0.003134                         | 0.001378                         | 0.001433                           |
| KM03_HOP_07 | 0.002687                         | 0.003603                           | 0.002306                       | 0.002945                         | 0.001553                         | 0.000937                           |
| KM03_HOP_08 | 0.002618                         | 0.003861                           | 0.002827                       | 0.002903                         | 0.001483                         | -0.00028                           |
| KM03_HOP_09 | 0.002817                         | 0.003595                           | 0.004216                       | 0.004005                         | 0.001662                         | 0.000811                           |
| KM03_HOP_10 | 0.001188                         | 0.001448                           | 0.00266                        | 0.000887                         | 0.00084                          | -7.4E-05                           |
| KM03_HOP_11 | 0.002492                         | 0.003191                           | 0.003855                       | 0.00232                          | 0.000791                         | 0.000176                           |
| KM03_HOP_12 | 0.002193                         | 0.002638                           | 0.002867                       | 0.00231                          | 0.000745                         | 8.76E-05                           |
| KM04_HOP_01 | 0.00238                          | 0.004437                           | 0.00223                        | 0.00395                          | 0.000831                         | 0.001099                           |
| KM04_HOP_02 | 0.001975                         | 0.003164                           | 0.002753                       | 0.00409                          | 0.000911                         | 6.61E-05                           |
| KM04_HOP_03 | 0.001845                         | 0.002919                           | 0.001334                       | 0.003714                         | 0.000863                         | 0.001681                           |
| KM04_HOP_04 | 0.001646                         | 0.002531                           | 0.001545                       | 0.001701                         | 0.000738                         | 0.001083                           |
| KM04_HOP_05 | 0.002128                         | 0.003592                           | 0.002448                       | 0.003509                         | 0.001436                         | 0.000986                           |
| KM04_HOP_06 | 0.003725                         | 0.006454                           | 0.003222                       | 0.006653                         | 0.002279                         | 0.000466                           |
| KM04_HOP_07 | 0.002396                         | 0.004336                           | 0.002309                       | 0.004025                         | 0.001153                         | 0.000688                           |
| KM04_HOP_08 | 0.000882                         | 0.001352                           | 0.003097                       | 0.002015                         | 0.000599                         | 0.000129                           |
| KM04_HOP_09 | 0.003293                         | 0.005505                           | 0.002419                       | 0.002289                         | 0.000556                         | 0.001201                           |
| KM04_HOP_10 | 0.002302                         | 0.003201                           | 0.002822                       | 0.001788                         | 0.001485                         | -4.2E-05                           |
| KM04_HOP_11 | 0.003029                         | 0.004888                           | 0.002696                       | 0.002091                         | 0.00152                          | 0.000615                           |
| KM04_HOP_12 | 0.001383                         | 0.002727                           | 0.002014                       | 0.001489                         | 0.000724                         | 0.000552                           |
| KM04_HOP_13 | 0.003218                         | 0.005288                           | 0.00416                        | 0.002802                         | 0.000668                         | -0.00016                           |
| KM04_HOP_14 | 0.002415                         | 0.004892                           | 0.003474                       | 0.002814                         | 0.00116                          | 0.000604                           |
| KM04_HOP_15 | 0.002495                         | 0.004848                           | 0.005182                       | 0.003034                         | 0.001236                         | -9.9E-05                           |
| KM05_HOP_01 | 0.003697                         | 0.006155                           | 0.003563                       | 0.004381                         | 0.003319                         | 0.002403                           |
| KM05_HOP_02 | 0.002425                         | 0.003686                           | 0.001363                       | 0.003105                         | 0.001701                         | -0.00031                           |
| KM05_HOP_03 | 0.004916                         | 0.007434                           | 0.002401                       | 0.005855                         | 0.00387                          | 0.000399                           |
| KM05_HOP_04 | 0.003109                         | 0.004889                           | 0.002852                       | 0.002733                         | 0.0014                           | -0.00011                           |
| KM05_HOP_05 | 0.004283                         | 0.006756                           | 0.002608                       | 0.005888                         | 0.001907                         | -0.00015                           |
| KM05_HOP_06 | 0.00291                          | 0.005075                           | 0.002707                       | 0.00302                          | 0.001191                         | -0.00057                           |
| KM05_HOP_07 | 0.004527                         | 0.007932                           | 0.004611                       | 0.005534                         | 0.002102                         | -0.00083                           |
| KM05_HOP_08 | 0.003605                         | 0.00625                            | 0.005082                       | 0.007273                         | 0.00292                          | 0.003491                           |
| KM06_HOP_01 | 0.003181                         | 0.005276                           | 0.00228                        | 0.005791                         | 0.001019                         | 0.000354                           |
| KM06_HOP_02 | 0.003739                         | 0.005996                           | 0.003195                       | 0.006111                         | 0.001202                         | 0.001185                           |
| KM06_HOP_03 | 0.002187                         | 0.00384                            | 0.001328                       | 0.003321                         | 0.001005                         | 0.001128                           |
| KM06_HOP_04 | 0.002439                         | 0.004969                           | 0.002666                       | 0.006414                         | 0.001092                         | 0.000448                           |
| KM06_HOP_05 | 0.002452                         | 0.004111                           | 0.001427                       | 0.004295                         | 0.000988                         | 0.000484                           |
| KM06_HOP_06 | 0.002456                         | 0.004841                           | 0.002471                       | 0.004694                         | 0.002142                         | 0.002165                           |
| KM06_HOP_07 | 0.0024                           | 0.004553                           | 0.001613                       | 0.004519                         | 0.001292                         | 0.000564                           |

Table S2 (cont.)

| <b>Trial</b>       | <b>TMT 3D<br/>Max<br/>Torque<br/>(N.m)</b> | <b>Ankle 3D<br/>Max<br/>Torque<br/>(N.m)</b> | <b>Knee 3D<br/>Max Torque<br/>(N.m)</b> | <b>Hip 3D Max<br/>Torque<br/>(N.m)</b> | <b>TMT XY<br/>Max<br/>Torque<br/>(N.m)</b> | <b>Ankle XY<br/>Max<br/>Torque<br/>(N.m)</b> |
|--------------------|--------------------------------------------|----------------------------------------------|-----------------------------------------|----------------------------------------|--------------------------------------------|----------------------------------------------|
| <i>KM06_HOP_08</i> | 0.002853                                   | 0.00462                                      | 0.001539                                | 0.004994                               | 0.001773                                   | 0.000852                                     |
| <i>KM06_HOP_09</i> | 0.002712                                   | 0.004743                                     | 0.003048                                | 0.003336                               | 0.001911                                   | -0.00017                                     |
| <i>KM06_HOP_10</i> | 0.002391                                   | 0.004526                                     | 0.003933                                | 0.004756                               | 0.001794                                   | 0.001058                                     |
| <i>KM06_HOP_11</i> | 0.003051                                   | 0.005762                                     | 0.002293                                | 0.00666                                | 0.002144                                   | 0.003973                                     |
| <i>KM06_HOP_12</i> | 0.00331                                    | 0.006827                                     | 0.00435                                 | 0.006057                               | 0.00194                                    | 0.000499                                     |
| <i>KM06_HOP_13</i> | 0.003341                                   | 0.005878                                     | 0.002477                                | 0.004506                               | 0.001805                                   | -0.00078                                     |
| <i>KM06_HOP_14</i> | 0.0028                                     | 0.005683                                     | 0.002807                                | 0.005751                               | 0.001674                                   | 0.000828                                     |
| <i>KM06_HOP_15</i> | 0.00263                                    | 0.005778                                     | 0.002371                                | 0.005911                               | 0.001429                                   | 0.001008                                     |

Table S2 (cont.)

| Trial       | Knee XY                | Hip XY Max<br>Torque<br>(N.m) | TMT XY Min<br>Torque<br>(N.m) | Ankle XY               | Knee XY<br>Min Torque<br>(N.m) | Hip XY Min<br>Torque<br>(N.m) |
|-------------|------------------------|-------------------------------|-------------------------------|------------------------|--------------------------------|-------------------------------|
|             | Max<br>Torque<br>(N.m) |                               |                               | Min<br>Torque<br>(N.m) |                                |                               |
| KM03_HOP_01 | 0.002546               | 0.000779                      | -0.00065                      | -0.00232               | -0.0011                        | -0.00071                      |
| KM03_HOP_02 | 0.002573               | 0.000668                      | -0.0005                       | -0.00176               | 0.000295                       | -0.00094                      |
| KM03_HOP_03 | 0.002276               | 0.001247                      | -0.0018                       | -0.00264               | 0.000258                       | -0.00062                      |
| KM03_HOP_04 | 0.003022               | 0.000924                      | -0.00174                      | -0.00306               | 0.000193                       | -0.00139                      |
| KM03_HOP_05 | 0.002794               | 0.001493                      | -0.00083                      | -0.00098               | -0.00303                       | -0.00386                      |
| KM03_HOP_06 | 0.003232               | 0.002002                      | -0.00069                      | -0.00236               | -0.00216                       | -0.00282                      |
| KM03_HOP_07 | 0.00202                | -0.00045                      | -0.00174                      | -0.00314               | -0.00141                       | -0.00256                      |
| KM03_HOP_08 | 0.002617               | 0.000206                      | -0.00157                      | -0.00349               | -0.00015                       | -0.00265                      |
| KM03_HOP_09 | 0.003702               | 0.001091                      | -0.00181                      | -0.00327               | -0.00176                       | -0.00346                      |
| KM03_HOP_10 | 0.002136               | 0.000487                      | -0.00095                      | -0.00135               | 0.000193                       | -0.00055                      |
| KM03_HOP_11 | 0.003231               | 0.000826                      | -0.00213                      | -0.00294               | -0.00127                       | -0.00189                      |
| KM03_HOP_12 | 0.002593               | 0.000376                      | -0.00185                      | -0.00236               | -0.00186                       | -0.00188                      |
| KM04_HOP_01 | 0.002                  | 0.000855                      | -0.00203                      | -0.00398               | -0.00137                       | -0.00343                      |
| KM04_HOP_02 | 0.002062               | 0.000876                      | -0.00162                      | -0.00286               | 0.000202                       | -0.00295                      |
| KM04_HOP_03 | 0.000614               | 0.000438                      | -0.00139                      | -0.0027                | -0.00108                       | -0.00301                      |
| KM04_HOP_04 | 0.001358               | 0.00067                       | -0.00147                      | -0.00242               | -0.00106                       | -0.00138                      |
| KM04_HOP_05 | 0.001762               | 0.000601                      | -0.00164                      | -0.00339               | -0.00138                       | -0.0028                       |
| KM04_HOP_06 | 0.00233                | 0.000801                      | -0.00204                      | -0.00592               | -0.00102                       | -0.00558                      |
| KM04_HOP_07 | 0.002002               | 0.001146                      | -0.00184                      | -0.00392               | -0.00149                       | -0.00346                      |
| KM04_HOP_08 | 0.002933               | 0.001894                      | -0.00078                      | -0.00126               | 0.000263                       | -0.00149                      |
| KM04_HOP_09 | 0.002009               | 0.000488                      | -0.003                        | -0.00487               | -0.00104                       | -0.00182                      |
| KM04_HOP_10 | 0.002586               | 0.001319                      | -0.00196                      | -0.00292               | -0.00014                       | -0.00117                      |
| KM04_HOP_11 | 0.00242                | 0.001063                      | -0.00257                      | -0.00433               | -0.00179                       | -0.0017                       |
| KM04_HOP_12 | 0.001677               | 0.000502                      | -0.00121                      | -0.00237               | -0.00097                       | -0.00116                      |
| KM04_HOP_13 | 0.003639               | 0.001083                      | -0.00283                      | -0.0047                | 0.000465                       | -0.00231                      |
| KM04_HOP_14 | 0.002971               | 0.001013                      | -0.00153                      | -0.00435               | -0.00154                       | -0.00197                      |
| KM04_HOP_15 | 0.004641               | 0.001127                      | -0.00158                      | -0.0043                | 0.000658                       | -0.0026                       |
| KM05_HOP_01 | 0.002986               | 0.000471                      | -0.00041                      | -0.00562               | -0.00178                       | -0.00344                      |
| KM05_HOP_02 | 0.001044               | 0.000325                      | 0.000222                      | -0.00334               | -0.00072                       | -0.00232                      |
| KM05_HOP_03 | 0.002146               | 0.000907                      | -0.00216                      | -0.00676               | -0.00142                       | -0.00461                      |
| KM05_HOP_04 | 0.002452               | -1.7E-05                      | -0.00286                      | -0.00448               | 0.000239                       | -0.00216                      |
| KM05_HOP_05 | 0.002422               | 0.000832                      | -0.00333                      | -0.00623               | -0.00036                       | -0.00468                      |
| KM05_HOP_06 | 0.002383               | 0.000297                      | -0.00255                      | -0.00451               | -0.00036                       | -0.00225                      |
| KM05_HOP_07 | 0.003531               | 0.000684                      | -0.00372                      | -0.00711               | -0.0007                        | -0.0045                       |
| KM05_HOP_08 | 0.000163               | 0.001621                      | -0.0004                       | -0.00546               | -0.00454                       | -0.00626                      |
| KM06_HOP_01 | 0.00077                | 0.000546                      | -0.00265                      | -0.00449               | -0.00172                       | -0.00415                      |
| KM06_HOP_02 | 0.000305               | 0.00027                       | -0.00307                      | -0.00549               | -0.0027                        | -0.00504                      |
| KM06_HOP_03 | 0.000493               | 0.000829                      | -0.0017                       | -0.00348               | -0.00099                       | -0.00258                      |
| KM06_HOP_04 | -0.00072               | 0.001419                      | -0.00222                      | -0.00424               | -0.00245                       | -0.00414                      |
| KM06_HOP_05 | 0.000915               | 0.000828                      | -0.00208                      | -0.00354               | -0.00131                       | -0.00285                      |
| KM06_HOP_06 | -0.00023               | -0.00049                      | -0.00071                      | -0.00445               | -0.00202                       | -0.00408                      |
| KM06_HOP_07 | 0.00128                | 0.00052                       | -0.00198                      | -0.00397               | -0.00137                       | -0.00308                      |



Table S2 (cont.)

| <b>Trial</b>       | <b>Knee XY<br/>Max<br/>Torque<br/>(N.m)</b> | <b>Hip XY Max<br/>Torque<br/>(N.m)</b> | <b>TMT XY Min<br/>Torque<br/>(N.m)</b> | <b>Ankle XY<br/>Min<br/>Torque<br/>(N.m)</b> | <b>Knee XY<br/>Min Torque<br/>(N.m)</b> | <b>Hip XY Min<br/>Torque<br/>(N.m)</b> |
|--------------------|---------------------------------------------|----------------------------------------|----------------------------------------|----------------------------------------------|-----------------------------------------|----------------------------------------|
| <i>KM06_HOP_08</i> | 0.000592                                    | 0.001413                               | -0.00211                               | -0.00425                                     | -0.00142                                | -0.00395                               |
| <i>KM06_HOP_09</i> | 0.002608                                    | 0.00062                                | -0.00147                               | -0.00435                                     | -0.00055                                | -0.00274                               |
| <i>KM06_HOP_10</i> | 0.002671                                    | 0.002164                               | -0.00123                               | -0.00415                                     | -0.00323                                | -0.00402                               |
| <i>KM06_HOP_11</i> | 0.00066                                     | 0.001378                               | -0.00177                               | -0.00474                                     | -0.00188                                | -0.00576                               |
| <i>KM06_HOP_12</i> | 0.0036                                      | 0.000892                               | -0.00259                               | -0.00618                                     | -0.00101                                | -0.0049                                |
| <i>KM06_HOP_13</i> | 0.002197                                    | -0.00092                               | -0.00242                               | -0.00537                                     | -0.00088                                | -0.00404                               |
| <i>KM06_HOP_14</i> | 0.002279                                    | -0.00066                               | -0.0019                                | -0.00516                                     | -0.00126                                | -0.00509                               |
| <i>KM06_HOP_15</i> | -0.00047                                    | 0.00101                                | -0.00181                               | -0.00531                                     | -0.00199                                | -0.00505                               |

Table S2 (cont.)

| Trial       | TMT XZ<br>Max<br>Torque<br>(N.m) | Ankle XZ<br>Max<br>Torque<br>(N.m) | Knee XZ<br>Max Torque<br>(N.m) | Hip XZ Max<br>Torque<br>(N.m) | TMT XZ<br>Min Torque<br>(N.m) | Ankle XZ<br>Min<br>Torque<br>(N.m) |
|-------------|----------------------------------|------------------------------------|--------------------------------|-------------------------------|-------------------------------|------------------------------------|
| KM03_HOP_01 | -4.1E-05                         | 4.77E-05                           | -0.00016                       | 0.000434                      | -0.00155                      | -0.0023                            |
| KM03_HOP_02 | -3.1E-05                         | -0.00013                           | -0.00033                       | 0.000671                      | -0.00123                      | -0.00189                           |
| KM03_HOP_03 | -8.1E-05                         | 0.000251                           | -5E-05                         | 0.000546                      | -0.00183                      | -0.00263                           |
| KM03_HOP_04 | -0.00011                         | 0.000505                           | -0.00019                       | 0.000924                      | -0.00223                      | -0.00321                           |
| KM03_HOP_05 | -9.2E-05                         | 0.002318                           | 0.001534                       | 0.001735                      | -0.0008                       | -0.00135                           |
| KM03_HOP_06 | -4.7E-05                         | 0.002355                           | 0.001847                       | 0.00106                       | -0.00152                      | 0.000227                           |
| KM03_HOP_07 | -4.8E-05                         | 0.003168                           | 0.001315                       | 0.001783                      | -0.00223                      | 0.000384                           |
| KM03_HOP_08 | -9.4E-05                         | 0.003255                           | -0.00011                       | 0.001409                      | -0.00214                      | -0.00133                           |
| KM03_HOP_09 | -8.8E-05                         | 0.002081                           | 0.002244                       | 0.002295                      | -0.00213                      | -0.00142                           |
| KM03_HOP_10 | 3.1E-05                          | 0.000564                           | 0.000148                       | 0.000559                      | -0.00104                      | -0.00137                           |
| KM03_HOP_11 | -5.8E-05                         | 0.00193                            | 0.000131                       | 0.001489                      | -0.00208                      | -0.00277                           |
| KM03_HOP_12 | -4.8E-05                         | 0.002192                           | 0.000117                       | 0.001511                      | -0.00193                      | -0.00162                           |
| KM04_HOP_01 | 0.00123                          | 0.003772                           | -0.00031                       | 0.001892                      | -0.00122                      | -0.00074                           |
| KM04_HOP_02 | -4.2E-05                         | 0.002402                           | -4.7E-05                       | 0.00356                       | -0.00163                      | -0.00183                           |
| KM04_HOP_03 | 0.000692                         | 0.002692                           | 0.001178                       | 0.002167                      | -0.0009                       | -0.00049                           |
| KM04_HOP_04 | 0.000769                         | 0.002365                           | -0.00018                       | 0.00111                       | -0.00142                      | -0.00099                           |
| KM04_HOP_05 | 0.001924                         | 0.003245                           | -0.00022                       | 0.002025                      | -0.00074                      | -0.00015                           |
| KM04_HOP_06 | 0.002651                         | 0.005685                           | 0.000171                       | 0.003597                      | -0.00107                      | -0.0006                            |
| KM04_HOP_07 | 0.001994                         | 0.003542                           | 0.000267                       | 0.001672                      | -0.00083                      | 0.000247                           |
| KM04_HOP_08 | -1.1E-05                         | 0.001221                           | -9.5E-05                       | 0.0019                        | -0.00076                      | -0.00092                           |
| KM04_HOP_09 | 0.001239                         | 0.005023                           | -0.00036                       | 0.001849                      | -0.0025                       | -0.00035                           |
| KM04_HOP_10 | 0.002033                         | 0.002969                           | 0.000127                       | 0.001328                      | -0.00114                      | -6.8E-05                           |
| KM04_HOP_11 | 0.002665                         | 0.004401                           | -0.00018                       | 0.00167                       | -0.00115                      | -0.00012                           |
| KM04_HOP_12 | -1.5E-05                         | 0.002451                           | 0.000453                       | 0.000724                      | -0.00128                      | -0.00027                           |
| KM04_HOP_13 | -3.6E-05                         | 0.004627                           | -0.00034                       | 0.001259                      | -0.00289                      | -0.00015                           |
| KM04_HOP_14 | 0.000219                         | 0.004115                           | -0.00041                       | 0.0015                        | -0.00113                      | 0.000222                           |
| KM04_HOP_15 | 0.001116                         | 0.003994                           | -0.00031                       | 0.002321                      | -0.00152                      | -8.5E-05                           |
| KM05_HOP_01 | -0.00017                         | 0.005502                           | -0.00031                       | 0.002989                      | -0.00327                      | -0.0017                            |
| KM05_HOP_02 | -9.2E-05                         | 0.003368                           | -0.00046                       | 0.002181                      | -0.00221                      | -0.00116                           |
| KM05_HOP_03 | -9.8E-05                         | 0.006686                           | 1.11E-05                       | 0.004093                      | -0.00453                      | -0.00025                           |
| KM05_HOP_04 | -0.00013                         | 0.00456                            | -0.00025                       | 0.002338                      | -0.00295                      | -0.0009                            |
| KM05_HOP_05 | 0.003397                         | 0.006017                           | 0.000353                       | 0.003414                      | -0.0011                       | -0.00064                           |
| KM05_HOP_06 | -9.4E-05                         | 0.00463                            | -0.00038                       | 0.002079                      | -0.00272                      | -0.00054                           |
| KM05_HOP_07 | 0.001828                         | 0.006695                           | -0.0004                        | 0.003203                      | -0.00291                      | -0.0028                            |
| KM05_HOP_08 | -6.5E-05                         | 0.005545                           | 0.003471                       | 0.002391                      | -0.00319                      | 0.000124                           |
| KM06_HOP_01 | 0.00275                          | 0.004461                           | 0.001816                       | 0.004509                      | -0.00045                      | 0.000142                           |
| KM06_HOP_02 | 0.003176                         | 0.004996                           | 0.001612                       | 0.003964                      | -0.00041                      | 0.000322                           |
| KM06_HOP_03 | 0.00147                          | 0.003521                           | 0.000987                       | 0.002451                      | -0.00123                      | -0.00021                           |
| KM06_HOP_04 | 0.00227                          | 0.00392                            | 0.001926                       | 0.004389                      | -0.00037                      | 9.26E-05                           |
| KM06_HOP_05 | 0.002181                         | 0.003499                           | 0.000916                       | 0.003134                      | -0.00029                      | 0.000185                           |
| KM06_HOP_06 | -0.0003                          | 0.004349                           | 0.002097                       | 0.002491                      | -0.00222                      | 5E-05                              |
| KM06_HOP_07 | 0.002186                         | 0.003864                           | 0.000619                       | 0.003296                      | -0.00078                      | 0.000124                           |

Table S2 (cont.)

| <b>Trial</b>       | <b>TMT XZ<br/>Max<br/>Torque<br/>(N.m)</b> | <b>Ankle XZ<br/>Max<br/>Torque<br/>(N.m)</b> | <b>Knee XZ<br/>Max Torque<br/>(N.m)</b> | <b>Hip XZ Max<br/>Torque<br/>(N.m)</b> | <b>TMT XZ<br/>Min Torque<br/>(N.m)</b> | <b>Ankle XZ<br/>Min<br/>Torque<br/>(N.m)</b> |
|--------------------|--------------------------------------------|----------------------------------------------|-----------------------------------------|----------------------------------------|----------------------------------------|----------------------------------------------|
| <i>KM06_HOP_08</i> | 0.002205                                   | 0.004161                                     | 0.001105                                | 0.003289                               | -0.00152                               | -0.00033                                     |
| <i>KM06_HOP_09</i> | 0.001809                                   | 0.004141                                     | 0.000415                                | 0.001933                               | -0.00158                               | -0.00022                                     |
| <i>KM06_HOP_10</i> | 0.001225                                   | 0.00388                                      | 0.002409                                | 0.001754                               | -0.00166                               | 0.000346                                     |
| <i>KM06_HOP_11</i> | 0.002136                                   | 0.00518                                      | 0.001985                                | 0.003535                               | -0.00199                               | 0.000124                                     |
| <i>KM06_HOP_12</i> | 0.002916                                   | 0.00583                                      | 0.000644                                | 0.003827                               | -0.001                                 | 0.000407                                     |
| <i>KM06_HOP_13</i> | 0.00205                                    | 0.005225                                     | 0.000689                                | 0.00291                                | -0.00214                               | 0.000746                                     |
| <i>KM06_HOP_14</i> | 0.002081                                   | 0.00465                                      | 0.000898                                | 0.002647                               | -0.00113                               | 0.000472                                     |
| <i>KM06_HOP_15</i> | 0.001802                                   | 0.005065                                     | 0.000988                                | 0.003747                               | -0.00135                               | 0.000539                                     |

Table S2 (cont.)

| <b>Trial</b>       | <b>Knee XZ<br/>Min Torque<br/>(N.m)</b> | <b>Hip XZ Min<br/>Torque<br/>(N.m)</b> |
|--------------------|-----------------------------------------|----------------------------------------|
| <i>KM03_HOP_01</i> | -0.00229                                | -0.00058                               |
| <i>KM03_HOP_02</i> | -0.00242                                | -0.00079                               |
| <i>KM03_HOP_03</i> | -0.0023                                 | -0.00099                               |
| <i>KM03_HOP_04</i> | -0.00297                                | -0.00042                               |
| <i>KM03_HOP_05</i> | -0.0041                                 | -0.0015                                |
| <i>KM03_HOP_06</i> | -0.00309                                | 0.000101                               |
| <i>KM03_HOP_07</i> | -0.00181                                | 0.000205                               |
| <i>KM03_HOP_08</i> | -0.00245                                | 9.18E-05                               |
| <i>KM03_HOP_09</i> | -0.00019                                | 0.000126                               |
| <i>KM03_HOP_10</i> | -0.00213                                | -0.00022                               |
| <i>KM03_HOP_11</i> | -0.00332                                | -0.00121                               |
| <i>KM03_HOP_12</i> | -0.00261                                | -0.00034                               |
| <i>KM04_HOP_01</i> | -0.00183                                | -0.00047                               |
| <i>KM04_HOP_02</i> | -0.00229                                | -0.00079                               |
| <i>KM04_HOP_03</i> | -0.00052                                | -0.00052                               |
| <i>KM04_HOP_04</i> | -0.00122                                | -0.00077                               |
| <i>KM04_HOP_05</i> | -0.00188                                | -3E-05                                 |
| <i>KM04_HOP_06</i> | -0.00262                                | -3.46E-06                              |
| <i>KM04_HOP_07</i> | -0.00177                                | 0.000143                               |
| <i>KM04_HOP_08</i> | -0.00243                                | -0.00066                               |
| <i>KM04_HOP_09</i> | -0.00171                                | -0.00057                               |
| <i>KM04_HOP_10</i> | -0.00209                                | -0.00082                               |
| <i>KM04_HOP_11</i> | -0.00206                                | -0.00118                               |
| <i>KM04_HOP_12</i> | -0.00159                                | -0.00056                               |
| <i>KM04_HOP_13</i> | -0.00339                                | -0.00115                               |
| <i>KM04_HOP_14</i> | -0.00269                                | 0.0002                                 |
| <i>KM04_HOP_15</i> | -0.00419                                | 0.000508                               |
| <i>KM05_HOP_01</i> | -0.00275                                | -0.00044                               |
| <i>KM05_HOP_02</i> | -0.00098                                | -0.00052                               |
| <i>KM05_HOP_03</i> | -0.00208                                | 0.000337                               |
| <i>KM05_HOP_04</i> | -0.00222                                | -0.00026                               |
| <i>KM05_HOP_05</i> | -0.00217                                | 0.000202                               |
| <i>KM05_HOP_06</i> | -0.00205                                | -0.00066                               |
| <i>KM05_HOP_07</i> | -0.00291                                | -0.00068                               |
| <i>KM05_HOP_08</i> | -0.00305                                | -0.00019                               |
| <i>KM06_HOP_01</i> | -0.00113                                | 0.000106                               |
| <i>KM06_HOP_02</i> | -0.00234                                | 1E-05                                  |
| <i>KM06_HOP_03</i> | -0.0006                                 | -0.00054                               |
| <i>KM06_HOP_04</i> | -0.00241                                | 0.000949                               |
| <i>KM06_HOP_05</i> | -0.00127                                | 0.000437                               |
| <i>KM06_HOP_06</i> | -0.00136                                | -3.4E-05                               |
| <i>KM06_HOP_07</i> | -0.00134                                | 0.000343                               |

**Table S2 (cont.)**

| <b>Trial</b>       | <b>Knee XZ<br/>Min Torque<br/>(N.m)</b> | <b>Hip XZ Min<br/>Torque<br/>(N.m)</b> |
|--------------------|-----------------------------------------|----------------------------------------|
| <i>KM06_HOP_08</i> | -0.00143                                | 9.05E-05                               |
| <i>KM06_HOP_09</i> | -0.00217                                | -0.00053                               |
| <i>KM06_HOP_10</i> | -0.00343                                | 0.000271                               |
| <i>KM06_HOP_11</i> | -0.0013                                 | 0.000292                               |
| <i>KM06_HOP_12</i> | -0.00315                                | 0.000178                               |
| <i>KM06_HOP_13</i> | -0.00212                                | 0.000268                               |
| <i>KM06_HOP_14</i> | -0.00216                                | 0.000199                               |
| <i>KM06_HOP_15</i> | -0.00165                                | 0.00019                                |

**Table S3.** ANCOVA testing for relationship between jump angle (continuous dependent variable) due to individual (nominal covariate) and the following continuous covariates: forces exerted (dorsoventral, anteroposterior, total [scaled to body weight]); kinematic performance metrics; 3D joint/body angles (range and maximum); maximum 3D external moment arms; maximum 3D external moments; and maximum and minimum XY and XZ moments. Interaction effects between individuals and continuous covariates also shown (significant results indicate differential response to continuous covariate as a function of individual). Bold entries indicate significant results.

| <b>DV Force (N)</b> | <b>df</b> | <b>SS</b> | <b>MS</b> | <b>F</b>       | <b>P (sig)</b>               |
|---------------------|-----------|-----------|-----------|----------------|------------------------------|
| Individual          | 3         | 287.696   | 95.8988   | 1.80488        | 0.160972                     |
| DV Force            | 1         | 13356.8   | 13356.8   | <b>251.384</b> | <b>2.46*10<sup>-19</sup></b> |
| Individual*DV Force | 3         | 1547.19   | 515.73    | <b>9.70638</b> | <b>0.00005</b>               |
| Error               | 42        | 2231.59   | 53.1331   |                |                              |
| Total               | 49        | 17423.3   |           |                |                              |

| <b>AP Force (N)</b> | <b>df</b> | <b>SS</b> | <b>MS</b> | <b>F</b> | <b>P (sig)</b> |
|---------------------|-----------|-----------|-----------|----------|----------------|
| Individual          | 3         | 287.696   | 95.8988   | 0.25904  | 0.854464       |
| AP Force            | 1         | 484.968   | 484.968   | 1.30998  | 0.258878       |
| Individual*AP Force | 3         | 1101.86   | 367.287   | 0.992108 | 0.405822       |
| Error               | 42        | 15548.8   | 370.209   |          |                |
| Total               | 49        | 17423.3   |           |          |                |

| <b>Total Force (x body weight)</b> | <b>df</b> | <b>SS</b> | <b>MS</b> | <b>F</b>       | <b>P (sig)</b>               |
|------------------------------------|-----------|-----------|-----------|----------------|------------------------------|
| Individual                         | 3         | 287.696   | 95.8988   | 1.53137        | 0.220393                     |
| Total Force                        | 1         | 13881.9   | 13881.9   | <b>221.674</b> | <b>2.34*10<sup>-18</sup></b> |
| Individual*Tot. Force              | 3         | 623.544   | 207.848   | <b>3.31904</b> | <b>0.0287781</b>             |
| Error                              | 42        | 2630.17   | 62.623    |                |                              |
| Total                              | 49        | 17423.3   |           |                |                              |

| <b>Velocity (ms<sup>-1</sup>)</b> | <b>df</b> | <b>SS</b> | <b>MS</b> | <b>F</b>       | <b>P (sig)</b>               |
|-----------------------------------|-----------|-----------|-----------|----------------|------------------------------|
| Individual                        | 3         | 287.696   | 95.8988   | 0.843156       | 0.478002                     |
| Velocity                          | 1         | 11829.5   | 11829.5   | <b>104.007</b> | <b>6.22*10<sup>-13</sup></b> |
| Individual*Velocity               | 3         | 529.067   | 176.356   | 1.55054        | 0.2156                       |
| Error                             | 42        | 4776.99   | 113.738   |                |                              |
| Total                             | 49        | 17423.3   |           |                |                              |

| <b>Velocity (SVL)</b> | <b>df</b> | <b>SS</b> | <b>MS</b> | <b>F</b>       | <b>P (sig)</b>               |
|-----------------------|-----------|-----------|-----------|----------------|------------------------------|
| Individual            | 3         | 287.696   | 95.8988   | 0.851031       | 0.473924                     |
| Velocity              | 1         | 11969.7   | 11969.7   | <b>106.222</b> | <b>4.52*10<sup>-13</sup></b> |
| Individual*Velocity   | 3         | 433.132   | 144.377   | 1.28124        | 0.293219                     |
| Error                 | 42        | 4732.79   | 112.685   |                |                              |
| Total                 | 49        | 17423.3   |           |                |                              |

| <b>Acceleration (<math>ms^{-2}</math>)</b> | <b>df</b> | <b>SS</b> | <b>MS</b> | <b>F</b>       | <b>P (sig)</b>  |
|--------------------------------------------|-----------|-----------|-----------|----------------|-----------------|
| Individual                                 | 3         | 287.696   | 95.8988   | 0.336934       | 0.798692        |
| Acceleration                               | 1         | 3450.38   | 3450.38   | <b>12.1227</b> | <b>0.001176</b> |
| Individual*Acc.                            | 3         | 1731.07   | 577.022   | 2.02733        | 0.124634        |
| Error                                      | 42        | 11954.1   | 284.622   |                |                 |
| Total                                      | 49        | 17423.3   |           |                |                 |

  

| <b>Ankle Range (°)</b> | <b>df</b> | <b>SS</b> | <b>MS</b> | <b>F</b>      | <b>P (sig)</b>  |
|------------------------|-----------|-----------|-----------|---------------|-----------------|
| Individual             | 3         | 287.696   | 95.8988   | 0.363183      | 0.779897        |
| Ankle range            | 1         | 4651.27   | 4651.27   | <b>17.615</b> | <b>0.000137</b> |
| Individual*Ankle rg.   | 3         | 1394.17   | 464.723   | 1.75997       | 0.169504        |
| Error                  | 42        | 11090.2   | 264.051   |               |                 |
| Total                  | 49        | 17423.3   |           |               |                 |

  

| <b>Ankle Max (°)</b> | <b>df</b> | <b>SS</b> | <b>MS</b> | <b>F</b>      | <b>P (sig)</b>  |
|----------------------|-----------|-----------|-----------|---------------|-----------------|
| Individual           | 3         | 287.696   | 95.8988   | 0.407099      | 0.748682        |
| Ankle max            | 1         | 5902.35   | 5902.35   | <b>25.056</b> | <b>0.000010</b> |
| Individual*Ankle mx. | 3         | 1339.46   | 446.486   | 1.89537       | 0.145058        |
| Error                | 42        | 9893.78   | 235.566   |               |                 |
| Total                | 49        | 17423.3   |           |               |                 |

  

| <b>Knee Range (°)</b> | <b>df</b> | <b>SS</b> | <b>MS</b> | <b>F</b>       | <b>P (sig)</b>               |
|-----------------------|-----------|-----------|-----------|----------------|------------------------------|
| Individual            | 3         | 287.696   | 95.8988   | 0.631812       | 0.598606                     |
| Knee range            | 1         | 10110.9   | 10110.9   | <b>66.6135</b> | <b>3.33*10<sup>-10</sup></b> |
| Individual*Knee rg.   | 3         | 649.813   | 216.604   | 1.42706        | 0.248339                     |
| Error                 | 42        | 6374.92   | 151.784   |                |                              |
| Total                 | 49        | 17423.3   |           |                |                              |

  

| <b>Knee Max (°)</b> | <b>df</b> | <b>SS</b> | <b>MS</b> | <b>F</b>       | <b>P (sig)</b>              |
|---------------------|-----------|-----------|-----------|----------------|-----------------------------|
| Individual          | 3         | 287.696   | 95.8988   | 0.507499       | 0.679244                    |
| Knee max            | 1         | 8316.78   | 8316.78   | <b>44.0126</b> | <b>4.86*10<sup>-8</sup></b> |
| Individual*Knee mx. | 3         | 882.33    | 294.11    | 1.55644        | 0.214149                    |
| Error               | 42        | 7936.48   | 188.964   |                |                             |
| Total               | 49        | 17423.3   |           |                |                             |

  

| <b>Hip Range (°)</b> | <b>df</b> | <b>SS</b> | <b>MS</b> | <b>F</b>       | <b>P (sig)</b>  |
|----------------------|-----------|-----------|-----------|----------------|-----------------|
| Individual           | 3         | 287.696   | 95.8988   | 0.353913       | 0.786527        |
| Hip range            | 1         | 5618.62   | 5618.62   | <b>20.7354</b> | <b>0.000045</b> |
| Individual*Hip rg.   | 3         | 136.334   | 45.4447   | 0.167713       | 0.917563        |
| Error                | 42        | 11380.6   | 270.967   |                |                 |
| Total                | 49        | 17423.3   |           |                |                 |

| <b>Hip Max (°)</b> | <b>df</b> | <b>SS</b> | <b>MS</b> | <b>F</b>       | <b>P (sig)</b>  |
|--------------------|-----------|-----------|-----------|----------------|-----------------|
| Individual         | 3         | 287.696   | 95.8988   | 0.274202       | 0.84366         |
| Hip max            | 1         | 1856.73   | 1856.73   | <b>5.30891</b> | <b>0.026232</b> |
| Individual*Hip mx. | 3         | 589.881   | 196.627   | 0.562213       | 0.642935        |
| Error              | 42        | 14689     | 349.738   |                |                 |
| Total              | 49        | 17423.3   |           |                |                 |

| <b>SI Range (°)</b> | <b>df</b> | <b>SS</b> | <b>MS</b> | <b>F</b>       | <b>P (sig)</b>  |
|---------------------|-----------|-----------|-----------|----------------|-----------------|
| Individual          | 3         | 287.696   | 95.8988   | 0.35203        | 0.787874        |
| SI range            | 1         | 3624.95   | 3624.95   | <b>13.3066</b> | <b>0.000724</b> |
| Individual*SI rg.   | 3         | 2069.14   | 689.713   | 2.53183        | 0.069922        |
| Error               | 42        | 11441.5   | 272.417   |                |                 |
| Total               | 49        | 17423.3   |           |                |                 |

| <b>SI Max (°)</b> | <b>df</b> | <b>SS</b> | <b>MS</b> | <b>F</b>       | <b>P (sig)</b>  |
|-------------------|-----------|-----------|-----------|----------------|-----------------|
| Individual        | 3         | 287.696   | 95.8988   | 0.299536       | 0.825526        |
| SI max            | 1         | 2802.64   | 2802.64   | <b>8.75392</b> | <b>0.005057</b> |
| Individual*SI mx. | 3         | 886.305   | 295.435   | 0.922778       | 0.438132        |
| Error             | 42        | 13446.6   | 320.158   |                |                 |
| Total             | 49        | 17423.3   |           |                |                 |

| <b>Body Range (°)</b> | <b>df</b> | <b>SS</b> | <b>MS</b> | <b>F</b>       | <b>P (sig)</b>              |
|-----------------------|-----------|-----------|-----------|----------------|-----------------------------|
| Individual            | 3         | 287.696   | 95.8988   | 0.572218       | 0.63643                     |
| Body range            | 1         | 9763.16   | 9763.16   | <b>58.2558</b> | <b>1.83*10<sup>-9</sup></b> |
| Individual*Body rg.   | 3         | 333.594   | 111.198   | 0.663507       | 0.579153                    |
| Error                 | 42        | 7038.83   | 167.591   |                |                             |
| Total                 | 49        | 17423.3   |           |                |                             |

| <b>Body Max (°)</b> | <b>df</b> | <b>SS</b> | <b>MS</b> | <b>F</b>       | <b>P (sig)</b>               |
|---------------------|-----------|-----------|-----------|----------------|------------------------------|
| Individual          | 3         | 287.696   | 95.8988   | 1.74328        | 0.172789                     |
| SI max              | 1         | 14735     | 14735     | <b>267.858</b> | <b>7.79*10<sup>-20</sup></b> |
| Individual*SI mx.   | 3         | 90.0996   | 30.0332   | 0.545953       | 0.653597                     |
| Error               | 42        | 2310.44   | 55.0106   |                |                              |
| Total               | 49        | 17423.3   |           |                |                              |

| <b>TMT Moment Arm</b> | <b>df</b> | <b>SS</b> | <b>MS</b> | <b>F</b>       | <b>P (sig)</b>              |
|-----------------------|-----------|-----------|-----------|----------------|-----------------------------|
| Individual            | 3         | 287.696   | 95.8988   | 0.410203       | 0.746491                    |
| TMT MA                | 1         | 6668.57   | 6668.57   | <b>28.5245</b> | <b>3.50*10<sup>-6</sup></b> |
| Individual*TMT MA     | 3         | 648.1     | 216.033   | 0.924073       | 0.437508                    |
| Error                 | 42        | 9818.91   | 233.784   |                |                             |
| Total                 | 49        | 17423.3   |           |                |                             |



| <b>Ankle Moment Arm</b> | <b>df</b> | <b>SS</b> | <b>MS</b> | <b>F</b>       | <b>P (sig)</b>  |
|-------------------------|-----------|-----------|-----------|----------------|-----------------|
| Individual              | 3         | 287.696   | 95.8988   | 0.366075       | 0.777831        |
| Ankle MA                | 1         | 5150.16   | 5150.16   | <b>19.6507</b> | <b>0.000065</b> |
| Individual*Ank. MA      | 3         | 982.894   | 327.631   | 1.25067        | 0.303568        |
| Error                   | 42        | 11002.5   | 261.965   |                |                 |
| Total                   | 49        | 17423.3   |           |                |                 |

| <b>Knee Moment Arm</b> | <b>df</b> | <b>SS</b> | <b>MS</b> | <b>F</b>      | <b>P (sig)</b>  |
|------------------------|-----------|-----------|-----------|---------------|-----------------|
| Individual             | 3         | 287.696   | 95.8988   | 0.338072      | 0.797875        |
| Knee MA                | 1         | 3947.19   | 3947.19   | <b>13.915</b> | <b>0.000567</b> |
| Individual*Knee MA     | 3         | 1274.53   | 424.843   | 1.4977        | 0.22906         |
| Error                  | 42        | 11913.9   | 283.664   |               |                 |
| Total                  | 49        | 17423.3   |           |               |                 |

| <b>Hip Moment Arm</b> | <b>df</b> | <b>SS</b> | <b>MS</b> | <b>F</b>       | <b>P (sig)</b>  |
|-----------------------|-----------|-----------|-----------|----------------|-----------------|
| Individual            | 3         | 287.696   | 95.8988   | 0.34083        | 0.79483         |
| Hip MA                | 1         | 4366.88   | 4366.88   | <b>15.6228</b> | <b>0.000291</b> |
| Individual*Hip MA     | 3         | 1028.85   | 342.949   | 1.22692        | 0.311845        |
| Error                 | 42        | 11739.9   | 279.52    |                |                 |
| Total                 | 49        | 17423.3   |           |                |                 |

| <b>TMT 3D Torques</b> | <b>df</b> | <b>SS</b> | <b>MS</b> | <b>F</b>      | <b>P (sig)</b>  |
|-----------------------|-----------|-----------|-----------|---------------|-----------------|
| Individual            | 3         | 287.696   | 95.8988   | 0.305253      | 0.821425        |
| TMT 3D Torques        | 1         | 3406.46   | 3406.46   | <b>10.843</b> | <b>0.002017</b> |
| Individual*TMT 3D     | 3         | 534.344   | 178.115   | 0.566952      | 0.639848        |
| Error                 | 42        | 13194.8   | 314.161   |               |                 |
| Total                 | 49        | 17423.3   |           |               |                 |

| <b>Ankle 3D Torques</b> | <b>df</b> | <b>SS</b> | <b>MS</b> | <b>F</b>       | <b>P (sig)</b>  |
|-------------------------|-----------|-----------|-----------|----------------|-----------------|
| Individual              | 3         | 287.696   | 95.8988   | 0.396802       | 0.755967        |
| Ankle 3D Torques        | 1         | 5809.52   | 5809.52   | <b>24.0381</b> | <b>0.000015</b> |
| Individual*Ankle 3D     | 3         | 1175.55   | 391.85    | 1.62137        | 0.198773        |
| Error                   | 42        | 10150.5   | 241.679   |                |                 |
| Total                   | 49        | 17423.3   |           |                |                 |

| <b>Knee 3D Torques</b> | <b>df</b> | <b>SS</b> | <b>MS</b> | <b>F</b>       | <b>P (sig)</b>  |
|------------------------|-----------|-----------|-----------|----------------|-----------------|
| Individual             | 3         | 287.696   | 95.8988   | 0.318502       | 0.811917        |
| Knee 3D Torques        | 1         | 4043.17   | 4043.17   | <b>13.4283</b> | <b>0.000689</b> |
| Individual*Knee 3D     | 3         | 446.505   | 148.835   | 0.494316       | 0.688169        |
| Error                  | 42        | 12645.9   | 301.093   |                |                 |
| Total                  | 49        | 17423.3   |           |                |                 |

| <b>Hip 3D Torques</b> | <b>df</b> | <b>SS</b> | <b>MS</b> | <b>F</b>       | <b>P (sig)</b>              |
|-----------------------|-----------|-----------|-----------|----------------|-----------------------------|
| Individual            | 3         | 287.696   | 95.8988   | 0.487611       | 0.692732                    |
| Hip 3D Torques        | 1         | 6380.44   | 6380.44   | <b>32.4422</b> | <b>1.09*10<sup>-6</sup></b> |
| Individual*Hip 3D     | 3         | 2494.99   | 831.662   | <b>4.22871</b> | <b>0.010627</b>             |
| Error                 | 42        | 8260.16   | 196.671   |                |                             |
| Total                 | 49        | 17423.3   |           |                |                             |

| <b>TMT XY Max</b>  | <b>df</b> | <b>SS</b> | <b>MS</b> | <b>F</b>      | <b>P (sig)</b>  |
|--------------------|-----------|-----------|-----------|---------------|-----------------|
| Individual         | 3         | 287.696   | 95.8988   | 0.305253      | 0.821425        |
| TMT XY Max         | 1         | 3406.46   | 3406.46   | <b>10.843</b> | <b>0.002017</b> |
| Individual*TMT +XY | 3         | 534.344   | 178.115   | 0.566952      | 0.639848        |
| Error              | 42        | 13194.8   | 314.161   |               |                 |
| Total              | 49        | 17423.3   |           |               |                 |

| <b>Ankle XY Max</b> | <b>df</b> | <b>SS</b> | <b>MS</b> | <b>F</b> | <b>P (sig)</b> |
|---------------------|-----------|-----------|-----------|----------|----------------|
| Individual          | 3         | 287.696   | 95.8988   | 0.258043 | 0.855173       |
| Ankle XY Max        | 1         | 458.15    | 458.15    | 1.23278  | 0.273183       |
| Individual*Ank +XY  | 3         | 1068.57   | 356.191   | 0.958432 | 0.421241       |
| Error               | 42        | 15608.9   | 371.64    |          |                |
| Total               | 49        | 17423.3   |           |          |                |

| <b>Knee XY Max</b>  | <b>df</b> | <b>SS</b> | <b>MS</b> | <b>F</b>       | <b>P (sig)</b>  |
|---------------------|-----------|-----------|-----------|----------------|-----------------|
| Individual          | 3         | 287.696   | 95.8988   | 0.258043       | 0.855173        |
| Knee XY Max         | 1         | 1798.76   | 1798.76   | <b>5.54583</b> | <b>0.023273</b> |
| Individual*Knee +XY | 3         | 1714.37   | 571.455   | 1.76188        | 0.169133        |
| Error               | 42        | 13622.5   | 324.344   |                |                 |
| Total               | 49        | 17423.3   |           |                |                 |

| <b>Hip XY Max</b>  | <b>df</b> | <b>SS</b> | <b>MS</b> | <b>F</b> | <b>P (sig)</b> |
|--------------------|-----------|-----------|-----------|----------|----------------|
| Individual         | 3         | 287.696   | 95.8988   | 0.260115 | 0.8537         |
| Hip XY Max         | 1         | 293.119   | 293.119   | 0.795051 | 0.377657       |
| Individual*Hip +XY | 3         | 1357.95   | 452.649   | 1.22776  | 0.311549       |
| Error              | 42        | 15484.5   | 368.679   |          |                |
| Total              | 49        | 17423.3   |           |          |                |

| <b>TMT XY Min</b>  | <b>df</b> | <b>SS</b> | <b>MS</b> | <b>F</b> | <b>P (sig)</b> |
|--------------------|-----------|-----------|-----------|----------|----------------|
| Individual         | 3         | 287.696   | 95.8988   | 0.241881 | 0.866619       |
| TMT XY Min         | 1         | 61.3934   | 61.3934   | 0.15485  | 0.695934       |
| Individual*TMT -XY | 3         | 422.408   | 140.803   | 0.35514  | 0.785648       |
| Error              | 42        | 16651.8   | 396.471   |          |                |
| Total              | 49        | 17423.3   |           |          |                |

| <b>Ankle XY Min</b>  | <b>df</b> | <b>SS</b> | <b>MS</b> | <b>F</b>       | <b>P (sig)</b>  |
|----------------------|-----------|-----------|-----------|----------------|-----------------|
| Individual           | 3         | 287.696   | 95.8988   | 0.315427       | 0.814124        |
| Ankle XY Min         | 1         | 4195.55   | 4195.55   | <b>13.7998</b> | <b>0.000594</b> |
| Individual*Ankle -XY | 3         | 170.836   | 56.9454   | 0.187303       | 0.904451        |
| Error                | 42        | 12769.2   | 304.029   |                |                 |
| Total                | 49        | 17423.3   |           |                |                 |

| <b>Knee XY Min</b>  | <b>df</b> | <b>SS</b> | <b>MS</b> | <b>F</b>       | <b>P (sig)</b>  |
|---------------------|-----------|-----------|-----------|----------------|-----------------|
| Individual          | 3         | 287.696   | 95.8988   | 0.289779       | 0.832519        |
| Knee XY Min         | 1         | 1649.9    | 1649.9    | <b>4.98554</b> | <b>0.030947</b> |
| Individual*Knee -XY | 3         | 1586.31   | 528.77    | 1.5978         | 0.204225        |
| Error               | 42        | 13899.4   | 330.937   |                |                 |
| Total               | 49        | 17423.3   |           |                |                 |

| <b>Hip XY Min</b>  | <b>df</b> | <b>SS</b> | <b>MS</b> | <b>F</b>       | <b>P (sig)</b>              |
|--------------------|-----------|-----------|-----------|----------------|-----------------------------|
| Individual         | 3         | 287.696   | 95.8988   | 0.56263        | 0.642663                    |
| Hip XY Min         | 1         | 8317.61   | 8317.61   | <b>48.7987</b> | <b>1.52*10<sup>-8</sup></b> |
| Individual*Hip -XY | 3         | 1659.19   | 553.063   | <b>3.24478</b> | <b>0.031263</b>             |
| Error              | 42        | 7158.79   | 170.447   |                |                             |
| Total              | 49        | 17423.3   |           |                |                             |

| <b>TMT XZ Max</b>  | <b>df</b> | <b>SS</b> | <b>MS</b> | <b>F</b> | <b>P (sig)</b> |
|--------------------|-----------|-----------|-----------|----------|----------------|
| Individual         | 3         | 287.696   | 95.8988   | 0.272762 | 0.844688       |
| TMT XZ Max         | 1         | 241.851   | 241.851   | 0.68789  | 0.411572       |
| Individual*TMT +XZ | 3         | 2127.21   | 709.07    | 2.01679  | 0.126153       |
| Error              | 42        | 14766.5   | 351.584   |          |                |
| Total              | 49        | 17423.3   |           |          |                |

|                      | <b>df</b> | <b>SS</b> | <b>MS</b> | <b>F</b>       | <b>P (sig)</b>              |
|----------------------|-----------|-----------|-----------|----------------|-----------------------------|
| <b>Ankle XZ Max</b>  |           |           |           |                |                             |
| Individual           | 3         | 287.696   | 95.8988   | 0.434353       | 0.729527                    |
| Ankle XZ Max         | 1         | 7366.48   | 7366.48   | <b>33.3649</b> | <b>8.33*10<sup>-7</sup></b> |
| Individual*Ankle +XZ | 3         | 496.114   | 165.371   | 0.749013       | 0.529062                    |
| Error                | 42        | 9272.99   | 220.786   |                |                             |
| Total                | 49        | 17423.3   |           |                |                             |

|                     | <b>df</b> | <b>SS</b> | <b>MS</b> | <b>F</b>       | <b>P (sig)</b>  |
|---------------------|-----------|-----------|-----------|----------------|-----------------|
| <b>Knee XZ Max</b>  |           |           |           |                |                 |
| Individual          | 3         | 287.696   | 95.8988   | 0.337399       | 0.798358        |
| Knee XZ Max         | 1         | 1897.94   | 1897.94   | <b>6.67748</b> | <b>0.013332</b> |
| Individual*Knee +XZ | 3         | 3300.01   | 1100      | <b>3.87012</b> | <b>0.015673</b> |
| Error               | 42        | 11937.6   | 284.23    |                |                 |
| Total               | 49        | 17423.3   |           |                |                 |

| <b>Hip XZ Max</b>  | <b>df</b> | <b>SS</b> | <b>MS</b> | <b>F</b>       | <b>P (sig)</b>  |
|--------------------|-----------|-----------|-----------|----------------|-----------------|
| Individual         | 3         | 287.696   | 95.8988   | 0.326399       | 0.80625         |
| Hip XZ Max         | 1         | 834.745   | 834.745   | 2.84112        | 0.099297        |
| Individual*Hip +XZ | 3         | 3960.88   | 1320.29   | <b>4.49372</b> | <b>0.008002</b> |
| Error              | 42        | 12340     | 293.809   |                |                 |
| Total              | 49        | 17423.3   |           |                |                 |

| <b>TMT XZ Min</b>  | <b>df</b> | <b>SS</b> | <b>MS</b> | <b>F</b> | <b>P (sig)</b> |
|--------------------|-----------|-----------|-----------|----------|----------------|
| Individual         | 3         | 287.696   | 95.8988   | 0.2505   | 0.860525       |
| TMT XZ Min         | 1         | 416.554   | 416.554   | 1.08809  | 0.302862       |
| Individual*TMT -XZ | 3         | 640.169   | 213.39    | 0.557401 | 0.646079       |
| Error              | 42        | 16078.9   | 382.83    |          |                |
| Total              | 49        | 17423.3   |           |          |                |

| <b>Ankle XZ Min</b>  | <b>df</b> | <b>SS</b> | <b>MS</b> | <b>F</b>       | <b>P (sig)</b>  |
|----------------------|-----------|-----------|-----------|----------------|-----------------|
| Individual           | 3         | 287.696   | 95.8988   | 0.317901       | 0.812349        |
| Ankle XZ Min         | 1         | 3430.62   | 3430.62   | <b>11.3724</b> | <b>0.001611</b> |
| Individual*Ankle -XZ | 3         | 1035.14   | 345.048   | 1.14382        | 0.342512        |
| Error                | 42        | 12669.8   | 301.662   |                |                 |
| Total                | 49        | 17423.3   |           |                |                 |

| <b>Knee XZ Min</b>  | <b>df</b> | <b>SS</b> | <b>MS</b> | <b>F</b>       | <b>P (sig)</b>  |
|---------------------|-----------|-----------|-----------|----------------|-----------------|
| Individual          | 3         | 287.696   | 95.8988   | 0.284527       | 0.836279        |
| Knee XZ Min         | 1         | 2087.35   | 2087.35   | <b>6.19306</b> | <b>0.016875</b> |
| Individual*Knee -XZ | 3         | 892.288   | 297.429   | 0.882458       | 0.457947        |
| Error               | 42        | 14155.9   | 337.046   |                |                 |
| Total               | 49        | 17423.3   |           |                |                 |

| <b>Hip XZ Min</b>  | <b>df</b> | <b>SS</b> | <b>MS</b> | <b>F</b>       | <b>P (sig)</b>  |
|--------------------|-----------|-----------|-----------|----------------|-----------------|
| Individual         | 3         | 287.696   | 95.8988   | 0.300264       | 0.825004        |
| Hip XZ Min         | 1         | 2419.06   | 2419.06   | <b>7.57421</b> | <b>0.008705</b> |
| Individual*Hip -XZ | 3         | 1302.5    | 434.167   | 1.3594         | 0.268274        |
| Error              | 42        | 13414     | 319.382   |                |                 |
| Total              | 49        | 17423.3   |           |                |                 |

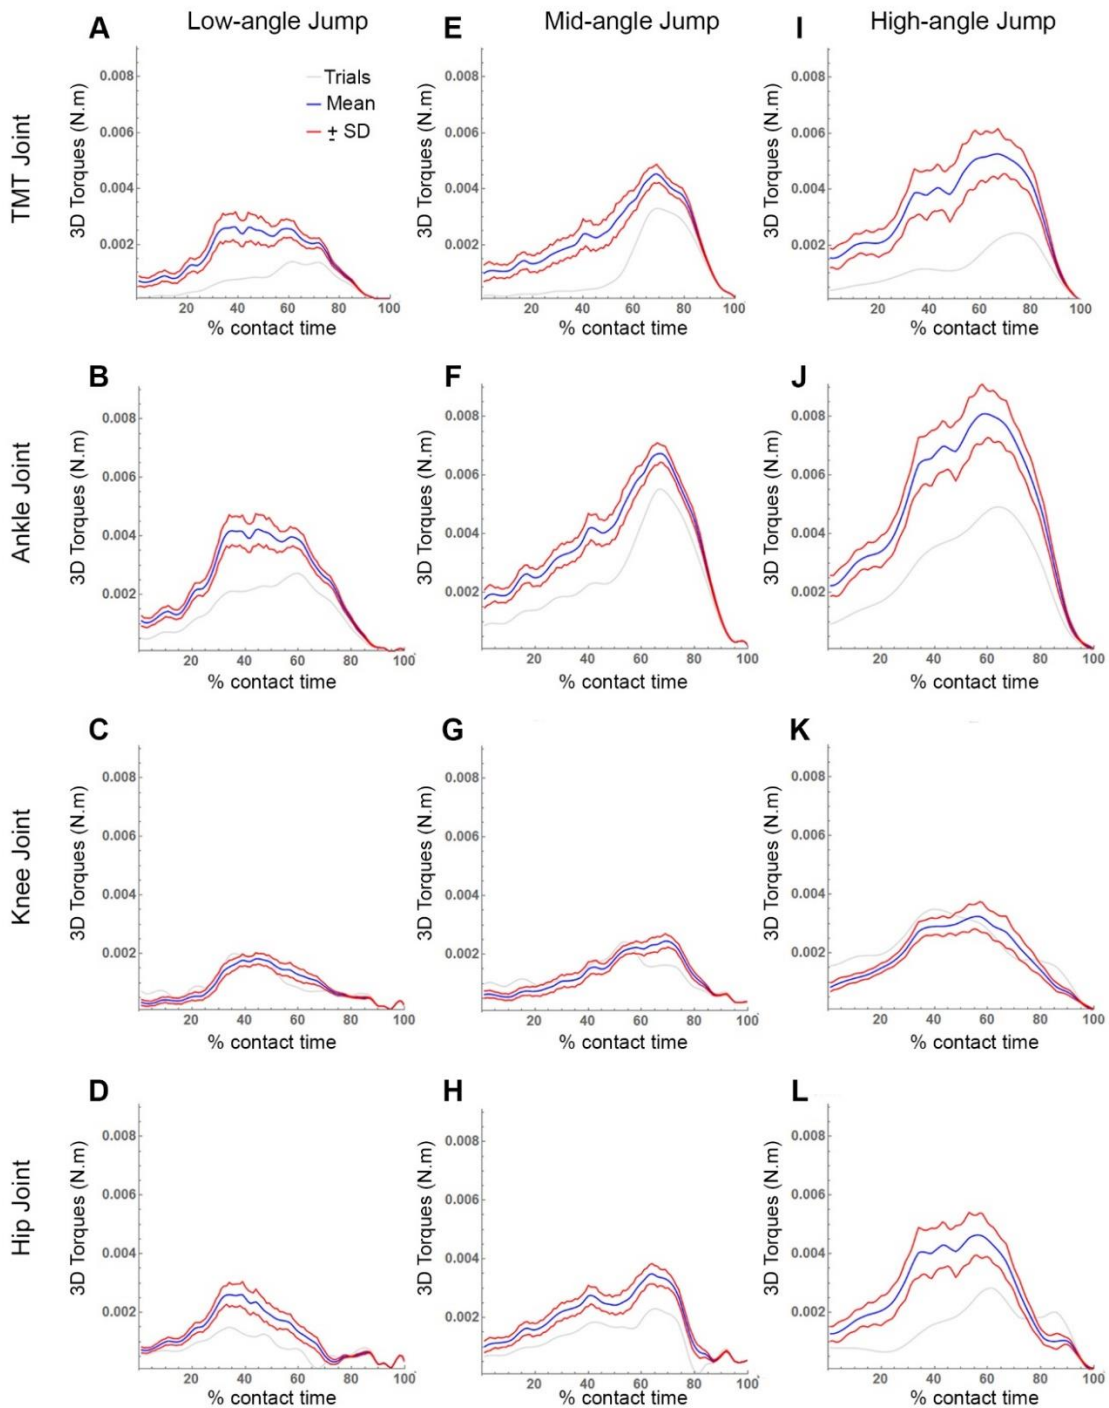

**Fig. S1.** Sensitivity analysis of the impact of center of pressure (COP) location on three-dimensional external torques at the TMT (A, E, I), ankle (B, F, J), knee (C, G, K) and hip (D, H, L) joints during low-angle (A-D, KM04 HOP 12), intermediate (E-H, KM04 HOP 09) and high-angle (I-L, KM04 HOP 14) jumps. Data are normalized and resampled to 100 time points and are shown to the same scale. Gray trace is data from the original trial (using estimated COP as described in the text). Blue trace is the mean of 100 iterations using alternate COP locations and red traces are the standard deviations.

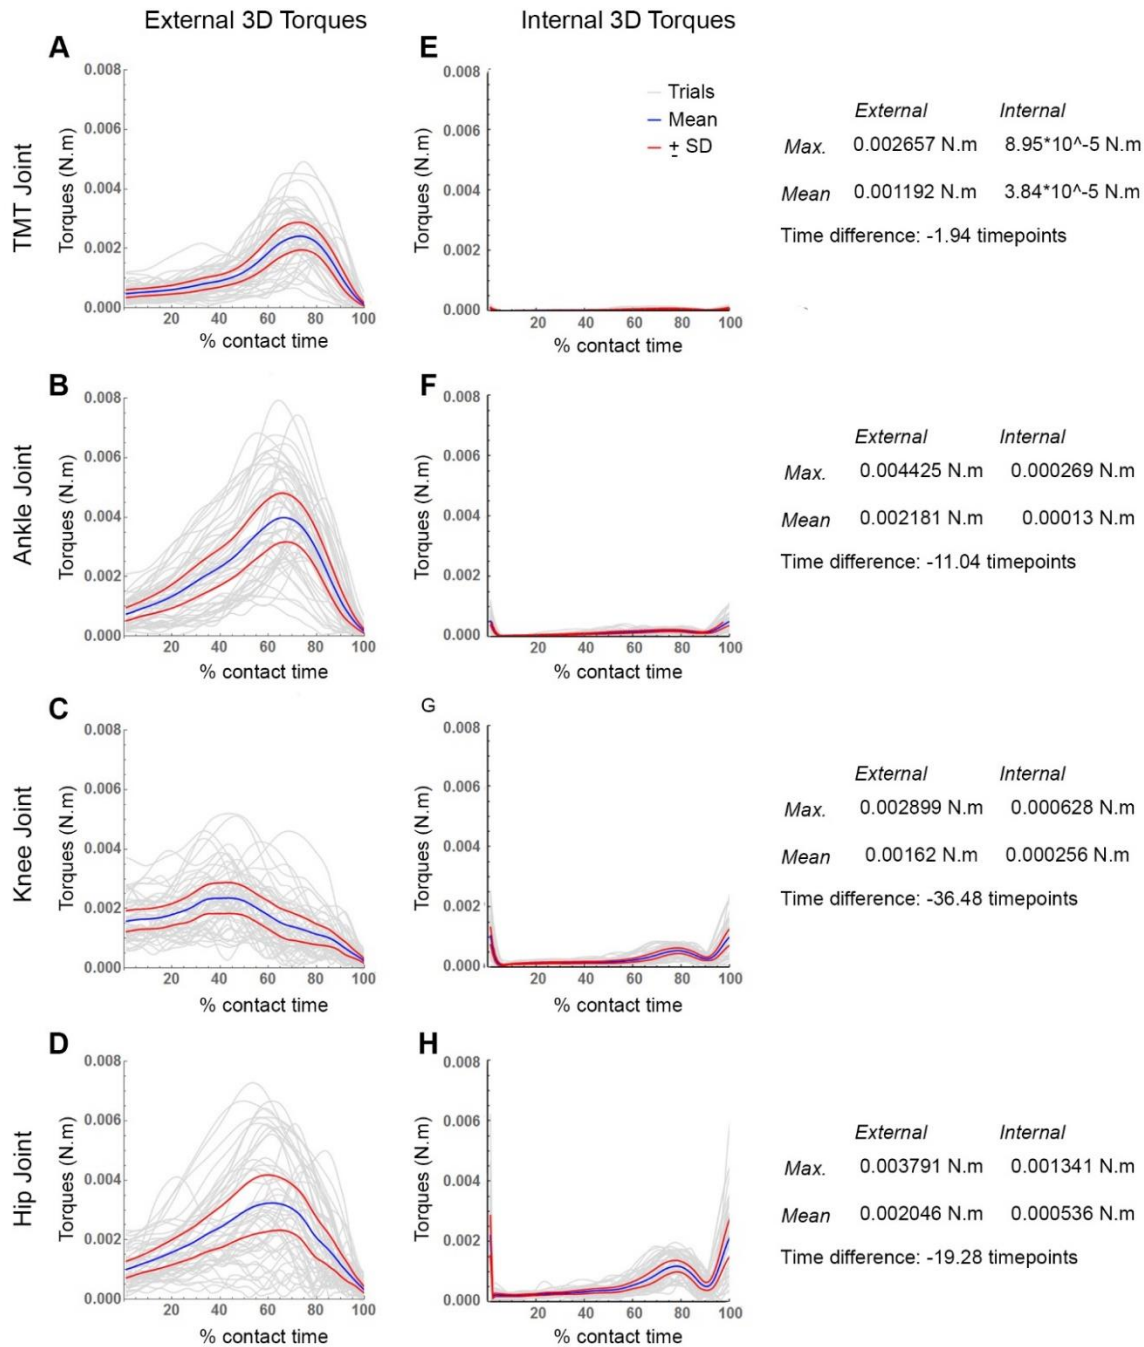

**Fig. S2.** Comparison of 3D external (A-D) and internal (E-H) joint torques at the TMT (A, E), ankle (B, F), knee (C, G) and hip (D, H) joints for all trials. Internal torques for foot segment are negligible and not shown. Data are normalized and resampled to 100 time points and are shown to the same scale. Gray traces are data from the individual trials; blue trace is the mean and red traces are the standard deviations. Right column shows average (for all trials) peak and mean external and internal torque magnitudes, and time difference between peak values (external – internal; thus, negative values indicate external torques peaked earlier). Artefactual high internal torques during the first and last few frames should be ignored.

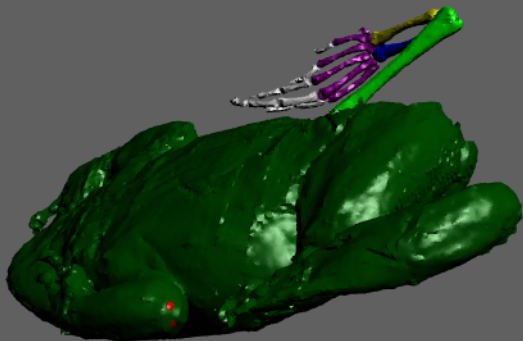

**Fig. S3.** Three-dimensional PDF of skeleton and body/limb segments of CT scans of *Kassina maculata* used to calculate segment properties. To manipulate, first download and activate the 3D PDF (by clicking on it). Left click and drag to rotate, right click and drag to zoom in and out, click both buttons and drag to pan. Open model tree on the upper toolbar to show or hide individual model parts.
